# Supplementary material for: Rhamnopyranoside-Based Fatty Acid Esters as Antimicrobials: Synthesis, Spectral Characterization, PASS, Antimicrobial, and Molecular Docking Studies
Source: MDPI journal article supplement (doi:10.3390/molecules28030986), 2023-01-18
Supplement: s1 [file s1]

## Supplementary Information (SI)

# Rhamnopyranoside-Based Fatty acid Esters as Antimicrobials: Synthesis, Spectral Characterization, PASS, Antimicrobial, and Molecular Docking Studies

Abul Fazal Muhammad Sanaullah <sup>1,t,✉</sup>, Puja Devi <sup>1,t,✉</sup>, Takbir Hossain <sup>1,t,✉</sup>, Sulaiman Bin Sultan <sup>1,t,✉</sup>, Mohammad Mohib Ullah Badhon <sup>1,t,✉</sup>, Md. Emdad Hossain <sup>2,t,✉</sup>, Jamal Uddin <sup>3,t,✉</sup>, Md. Abdul Majed Patwary <sup>4,t,✉</sup>, Mohsin Kazi <sup>5,\*</sup>, <sup>✉</sup>, and Mohammed Mahbubul Matin <sup>1,t,\*</sup> <sup>✉</sup>

### Table of contents

| Sl. No. | Name of spectrum                             | Compound                        | Page                                             |
|---------|----------------------------------------------|---------------------------------|--------------------------------------------------|
| 1.      | FT-IR spectra                                | <b>4, 6, 7, 9, 11</b>           | 1, 8, 10, 15, 20                                 |
| 2.      | <sup>1</sup> H NMR spectra (with expansion)  | <b>4, 5, 6, 7, 8, 9, 10, 11</b> | 2, 3, 5, 6, 8, 9, 11, 12, 13, 15, 16, 17, 18, 21 |
| 3.      | <sup>13</sup> C NMR spectra (with expansion) | <b>4, 5, 6, 7, 8, 9, 10</b>     | 3, 7, 10, 12, 14, 17, 19                         |
| 4.      | 2D DEPT                                      | <b>4</b>                        | 4                                                |
| 5.      | 2D COSY spectra                              | <b>4, 8, 10</b>                 | 4, 14, 19                                        |
| 6.      | 2D HSQC spectra                              | <b>10</b>                       | 20                                               |
| 7.      | 2D HMBC spectra                              | <b>4, 5</b>                     | 5, 7                                             |

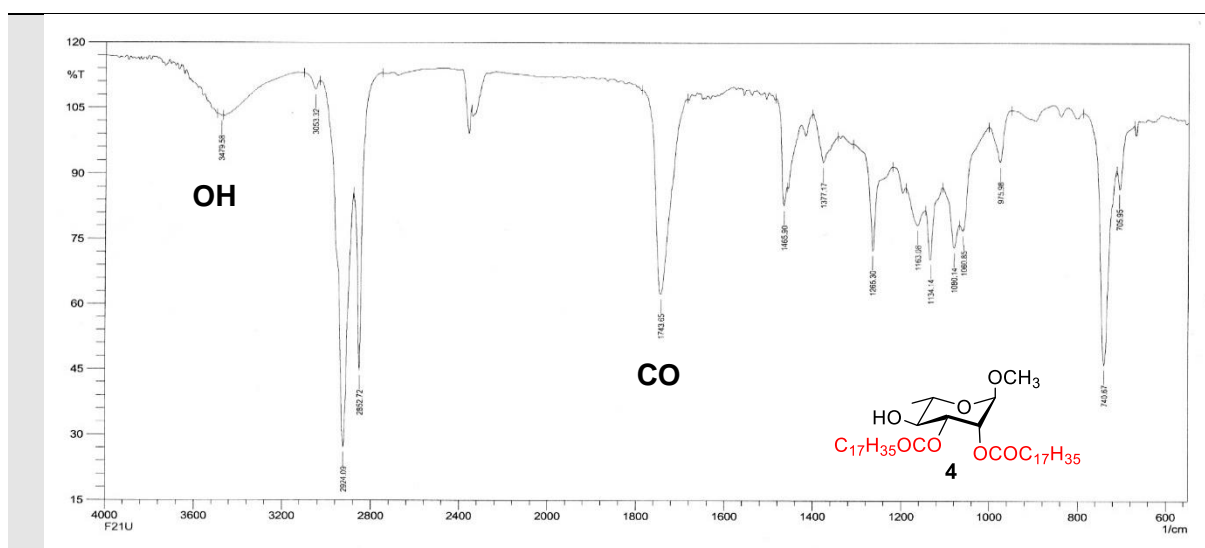

**Figure S1.** FT-IR (neat) spectrum of compound 4.

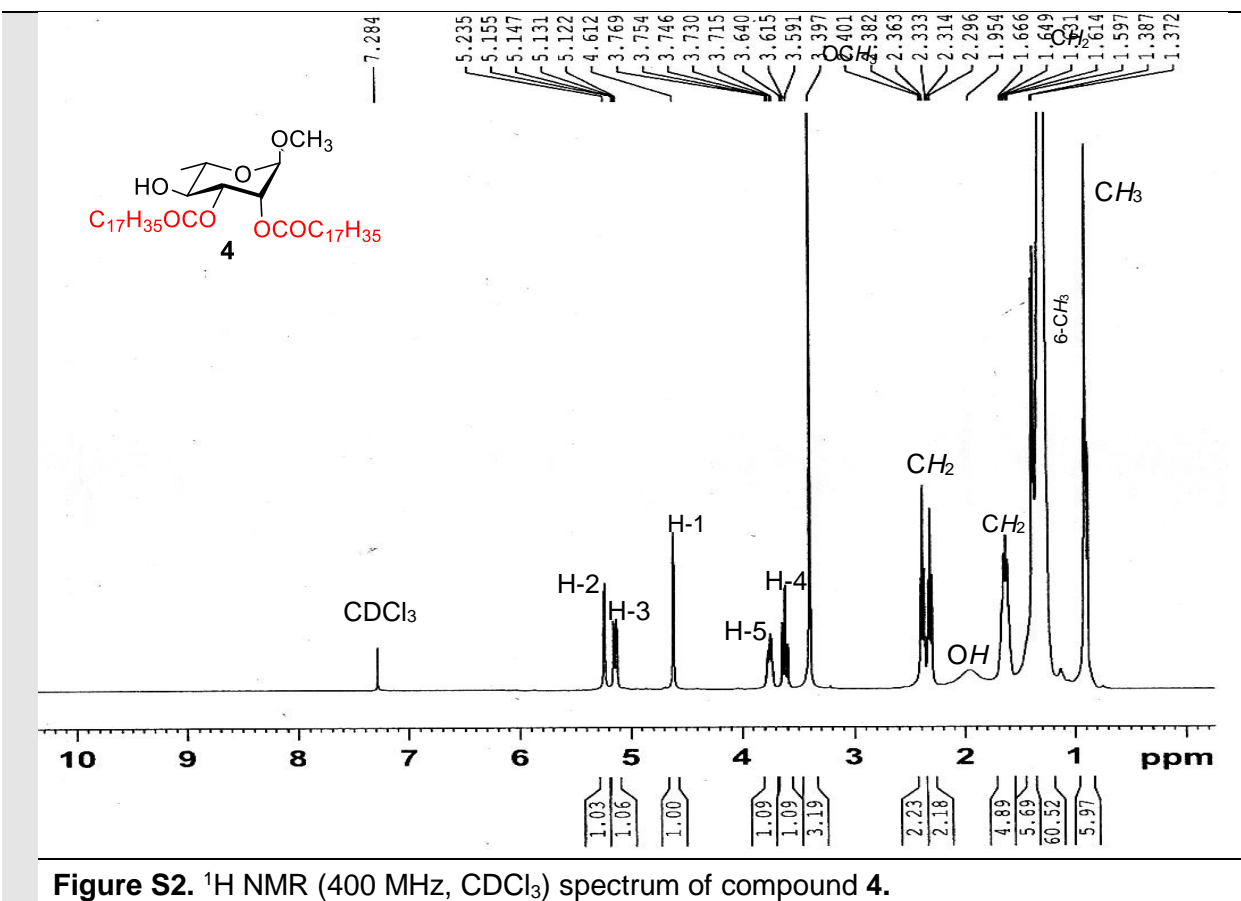

**Figure S2.** <sup>1</sup>H NMR (400 MHz, CDCl<sub>3</sub>) spectrum of compound **4**.

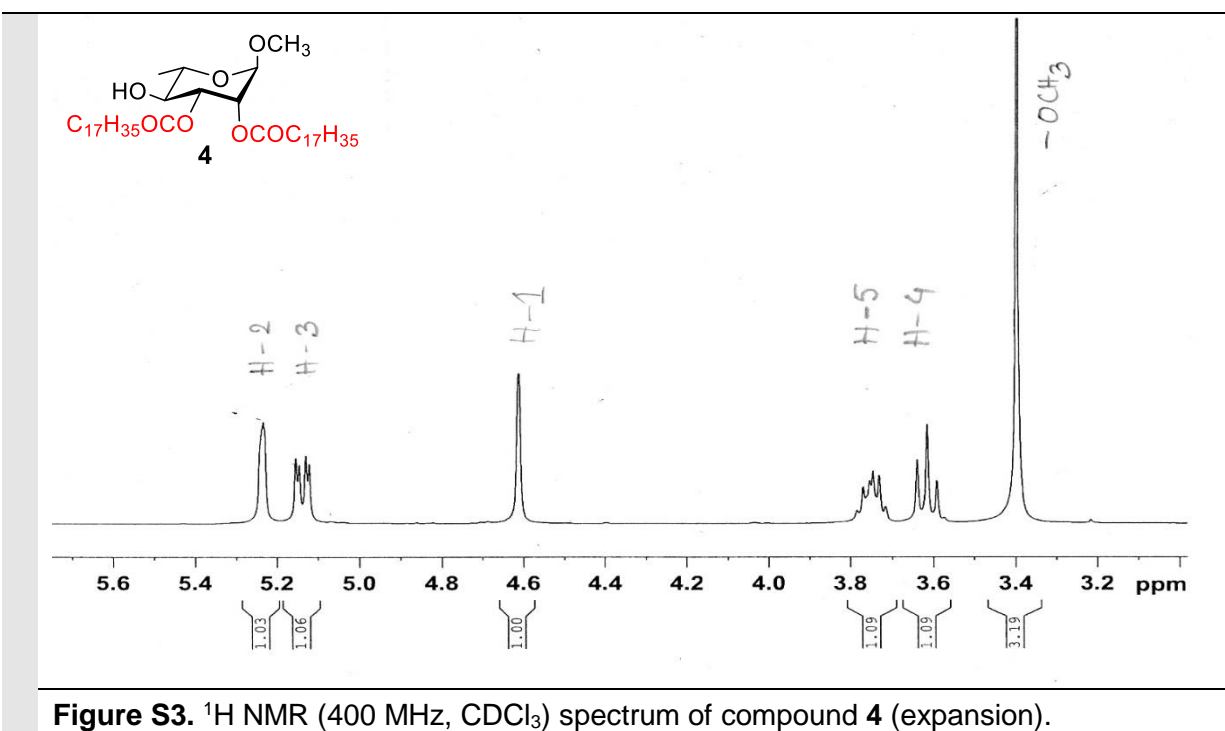

**Figure S3.** <sup>1</sup>H NMR (400 MHz, CDCl<sub>3</sub>) spectrum of compound **4** (expansion).

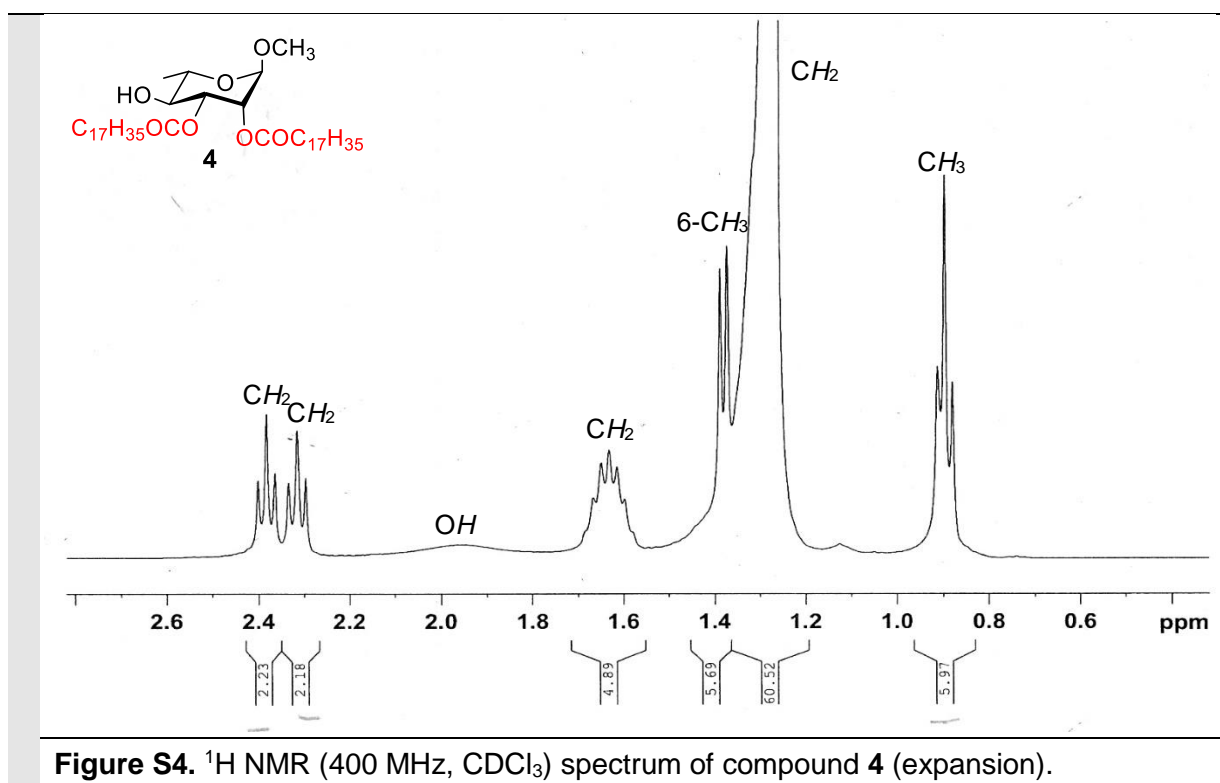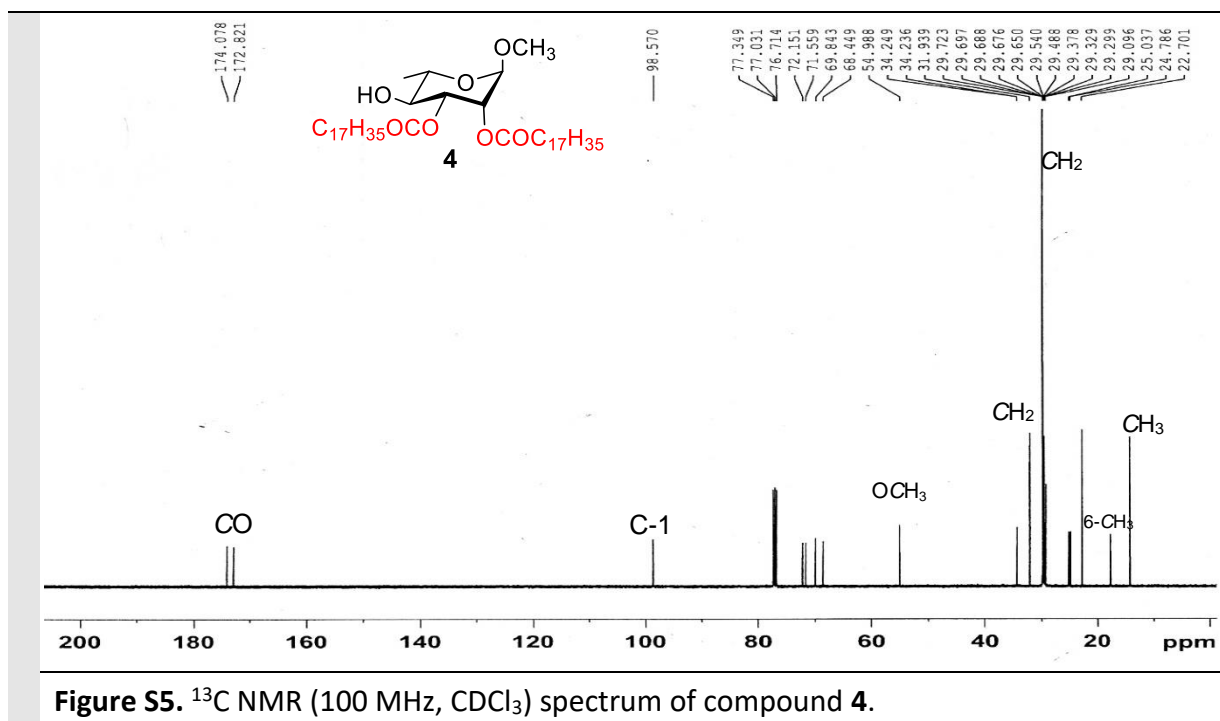

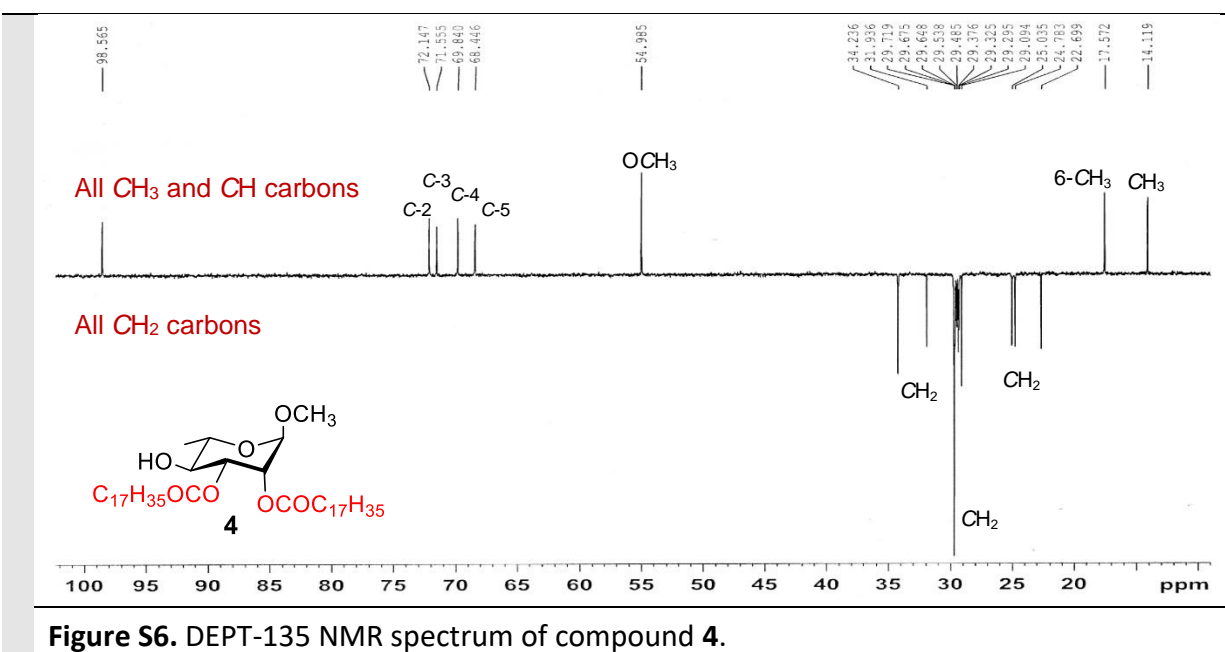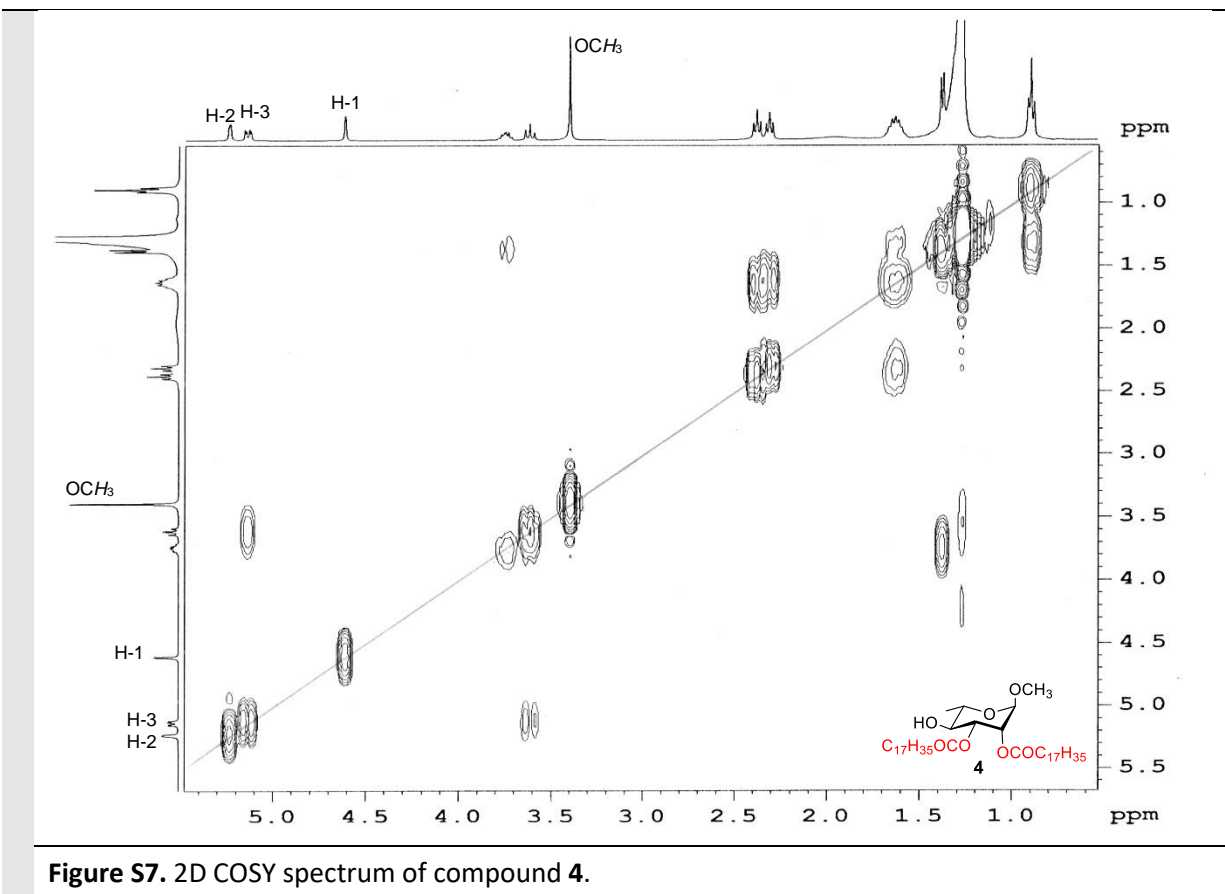

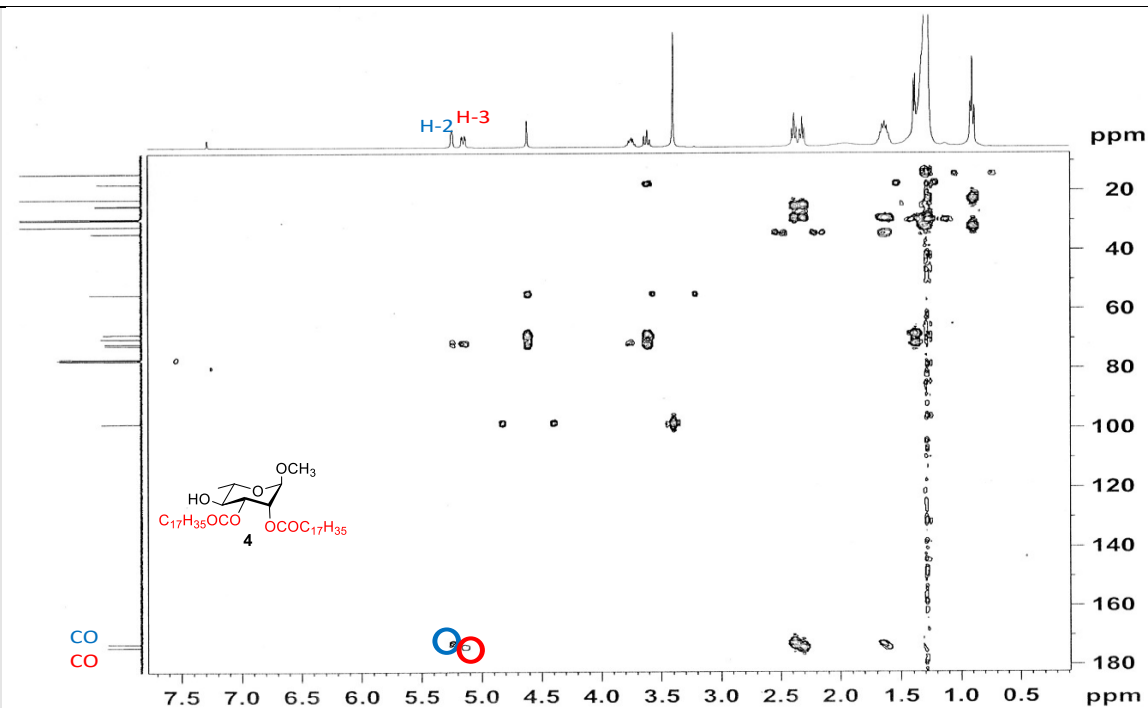

**Figure S8.** 2D HMBC spectrum of compound 4.

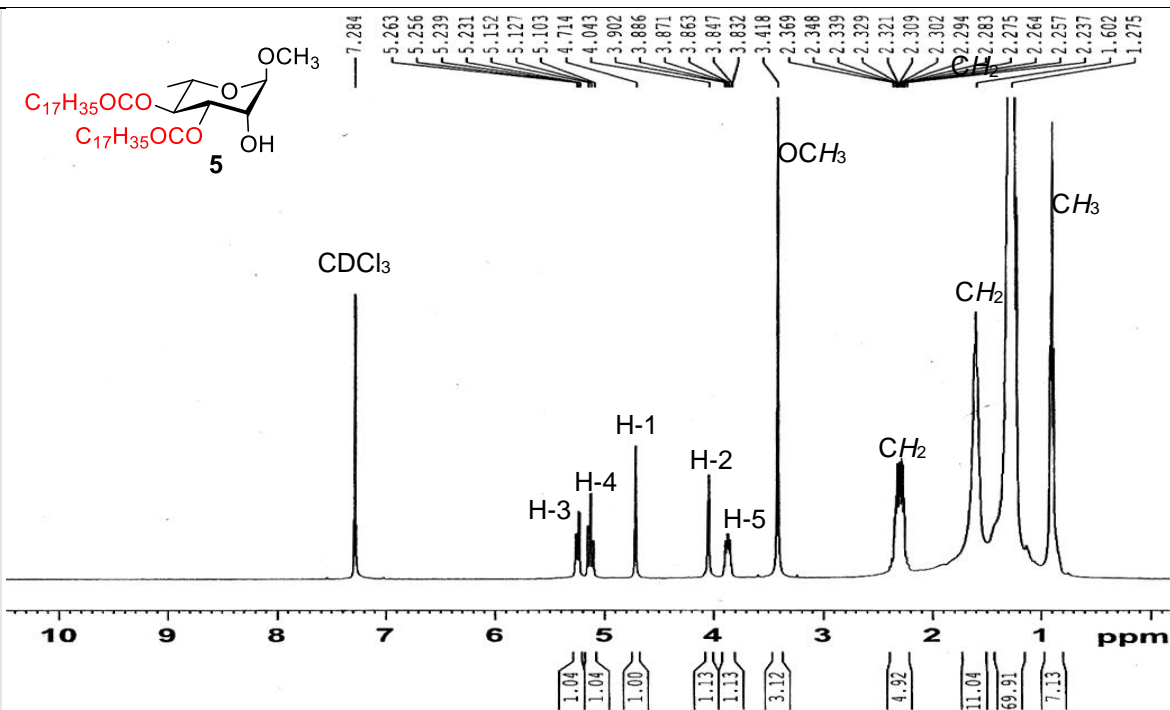

**Figure S9.**  $^1\text{H}$  NMR (400 MHz,  $\text{CDCl}_3$ ) spectrum of compound 5.

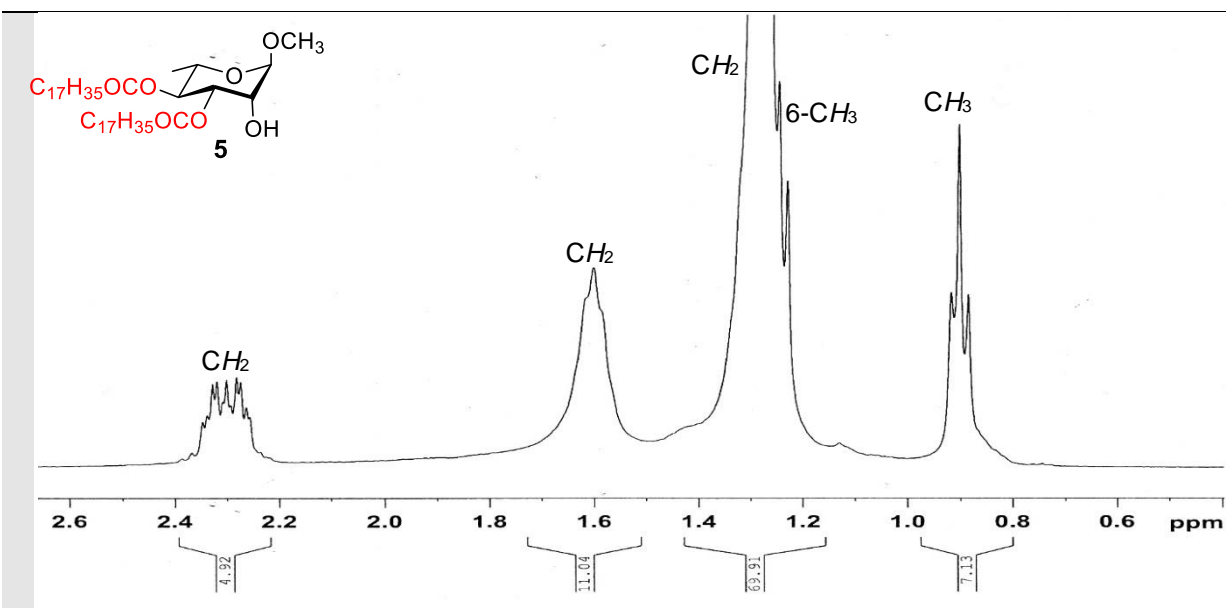

**Figure S10.** <sup>1</sup>H NMR (400 MHz, CDCl<sub>3</sub>) spectrum (Expansion) of compound 5.

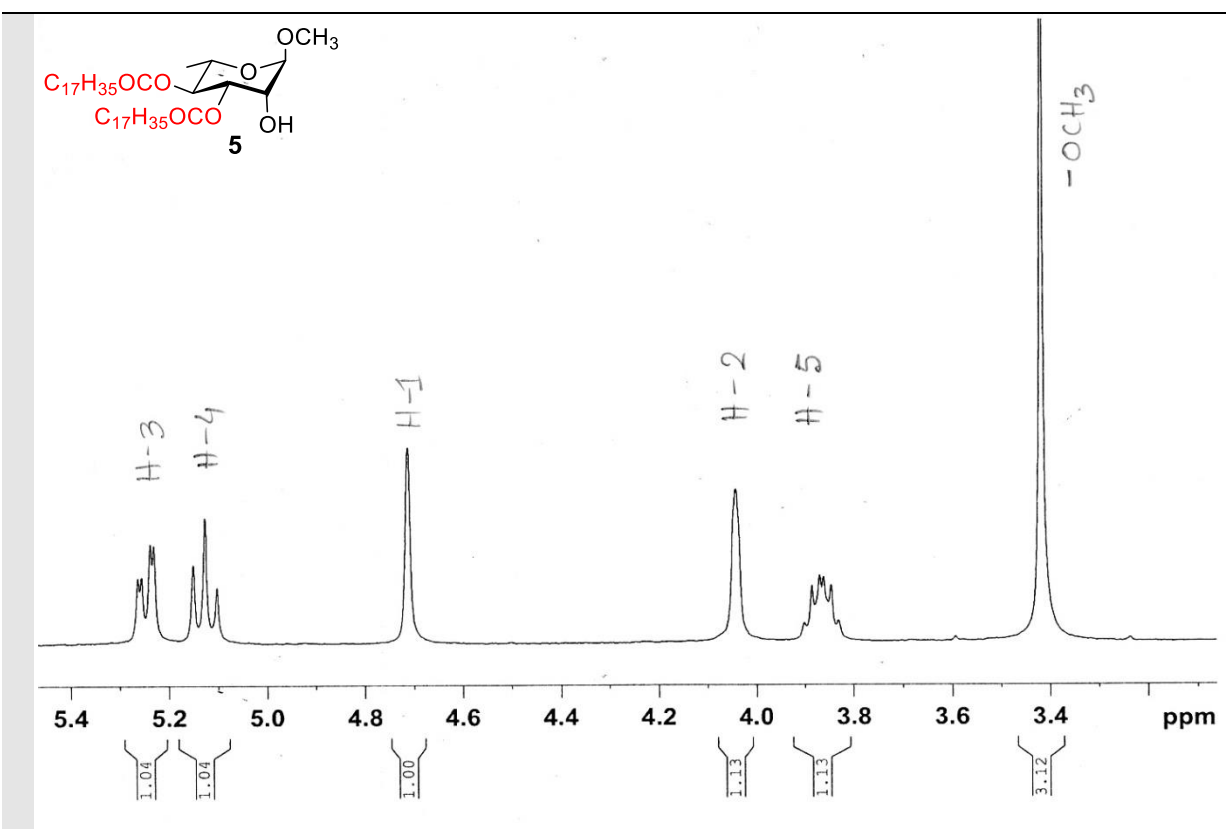

**Figure S11.** <sup>1</sup>H NMR (400 MHz, CDCl<sub>3</sub>) spectrum (Expansion) of compound 5.

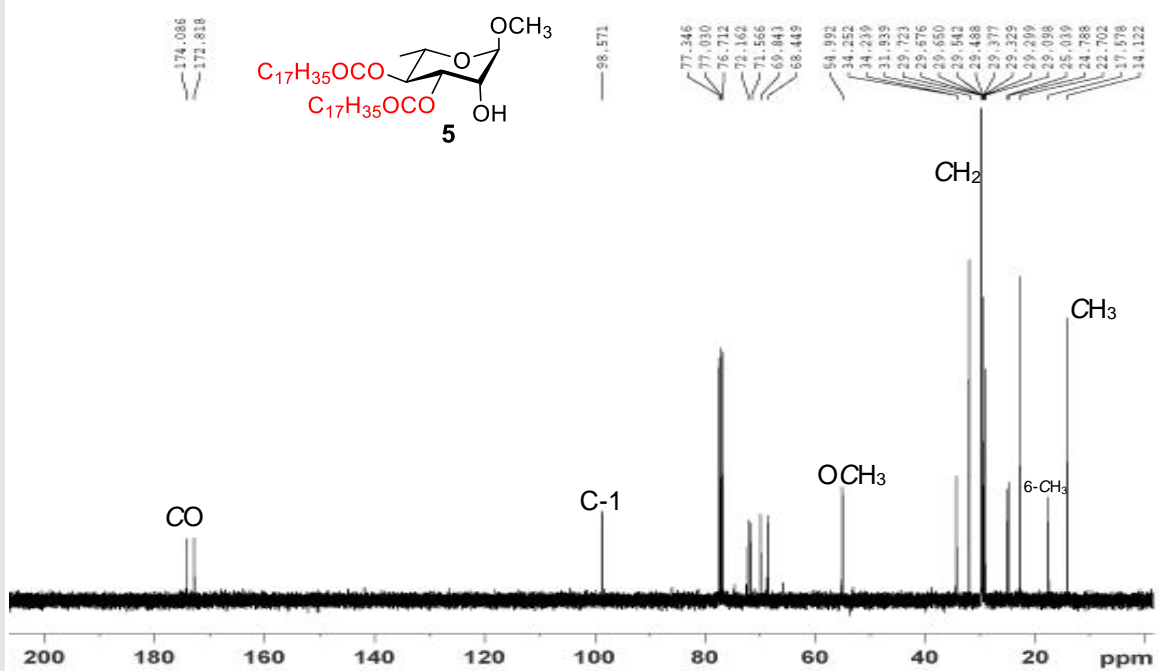

**Figure S12.** <sup>13</sup>C NMR (100 MHz, CDCl<sub>3</sub>) spectrum of compound 5.

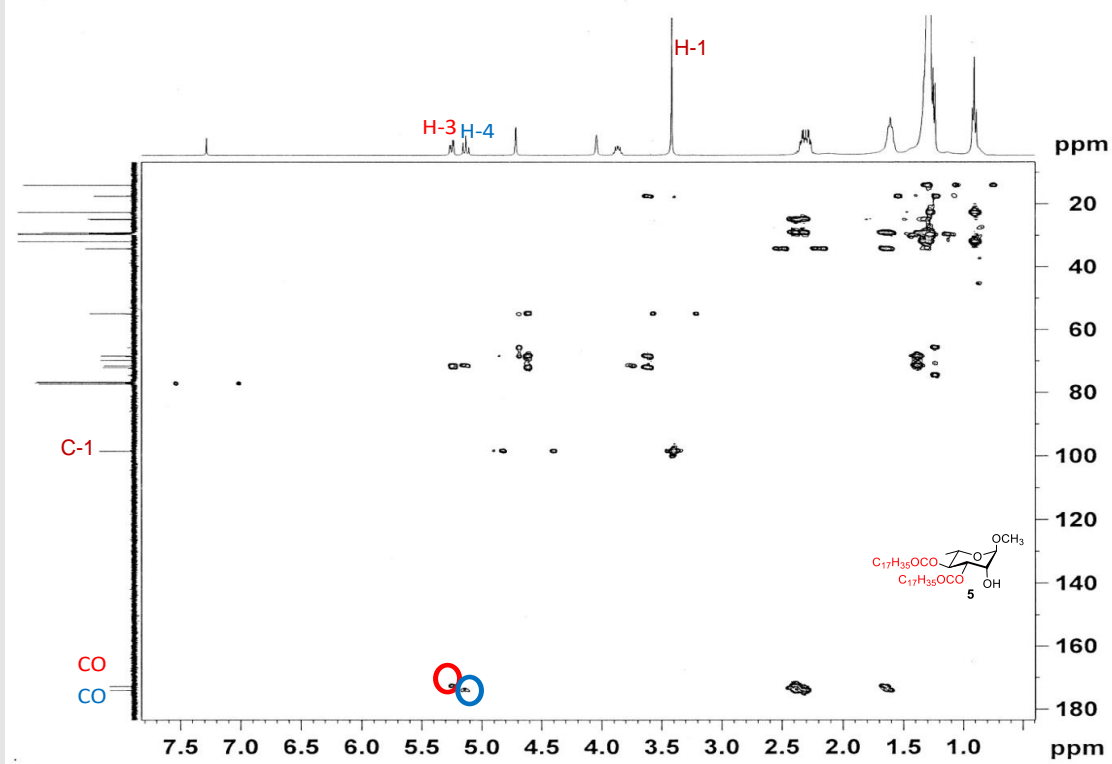

**Figure S13.** 2D HMBC spectrum of compound 5.

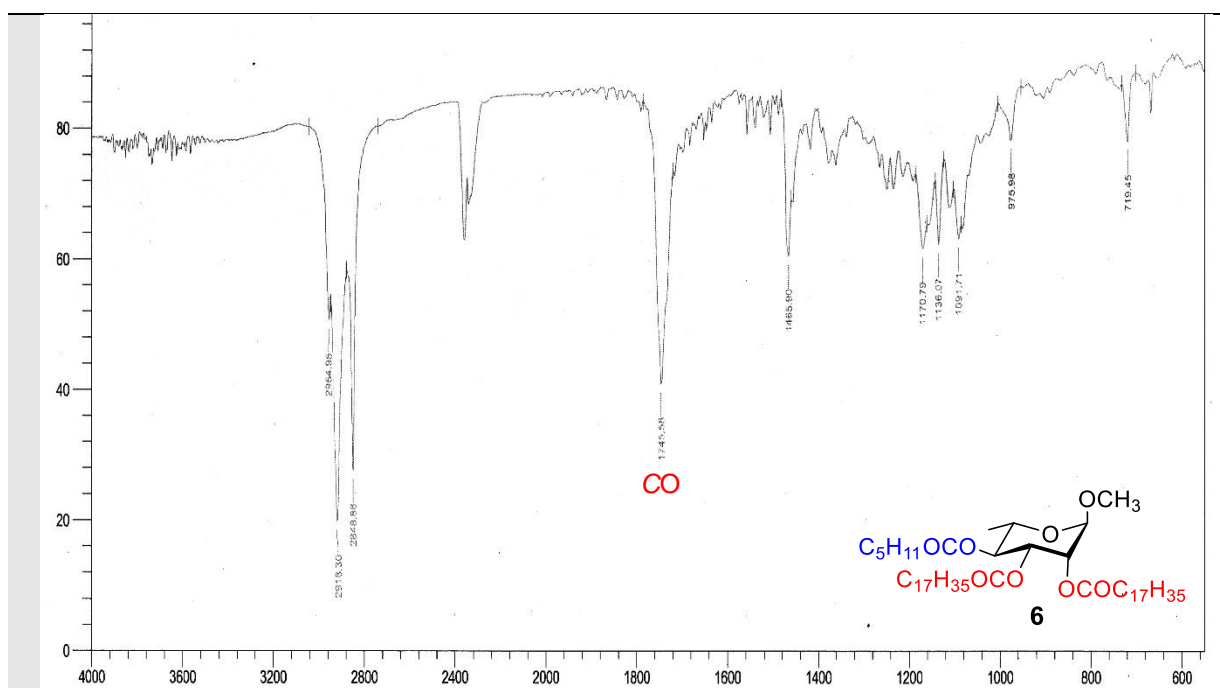

**Figure S14.** IR (neat) spectrum of compound **6**.

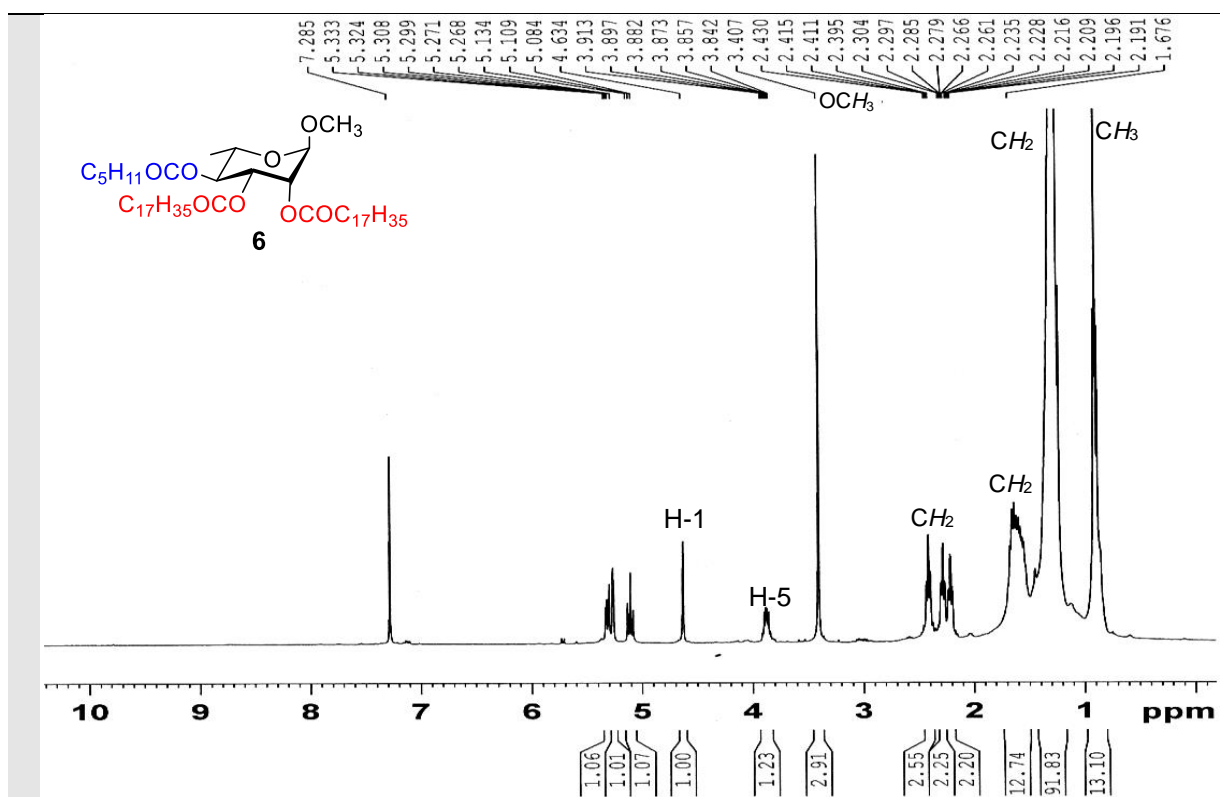

**Figure S15.**  $^1\text{H}$  NMR (400 MHz,  $\text{CDCl}_3$ ) spectrum of compound **6**.

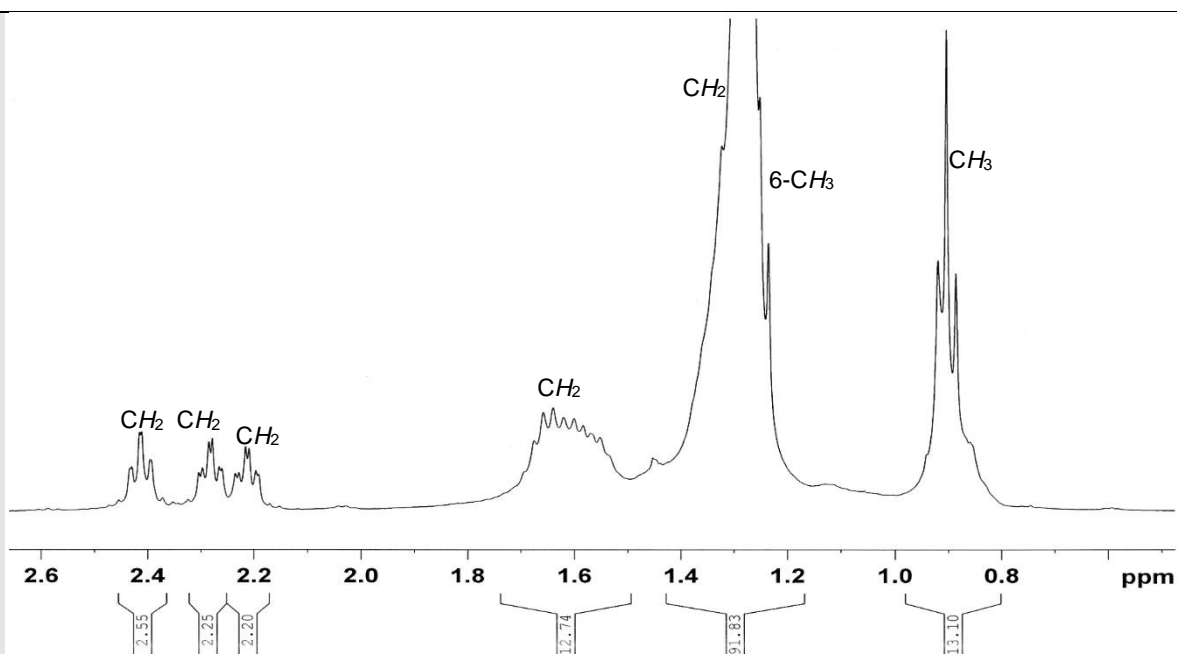

**Figure S16.**  $^1\text{H}$  NMR (400 MHz,  $\text{CDCl}_3$ ) spectrum (Expansion) of compound 6.

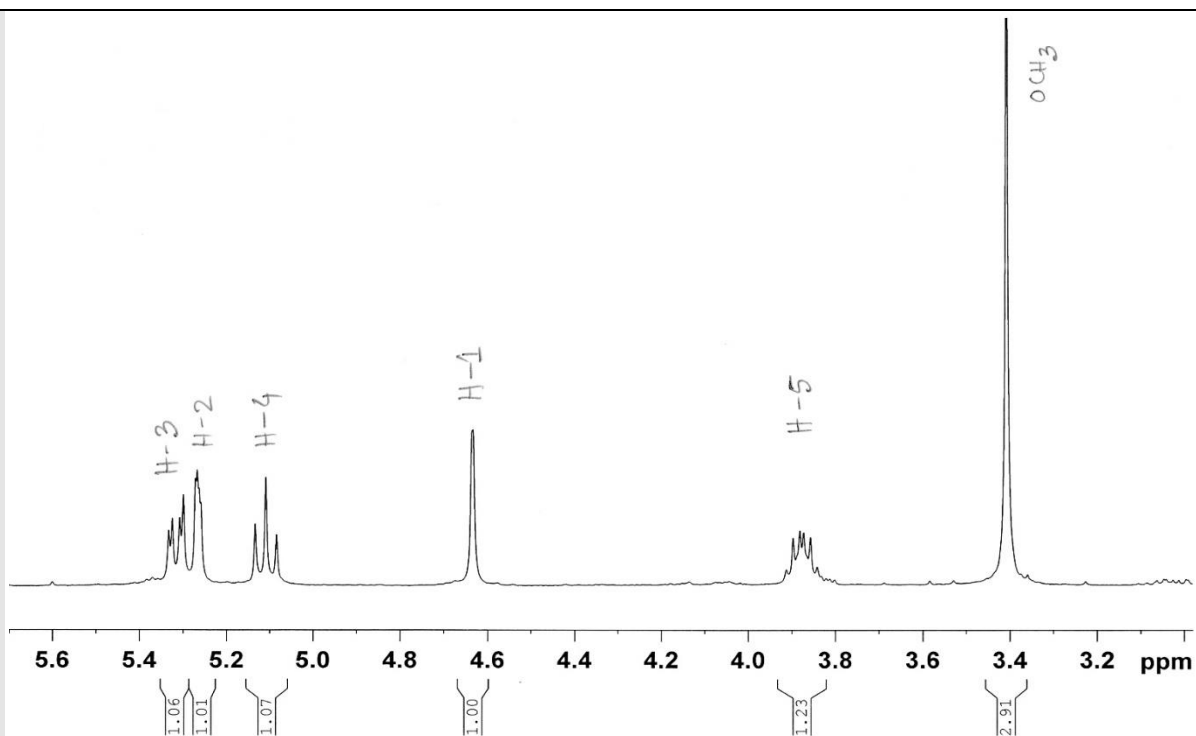

**Figure S17.**  $^1\text{H}$  NMR (400 MHz,  $\text{CDCl}_3$ ) spectrum (Expansion) of compound 6.

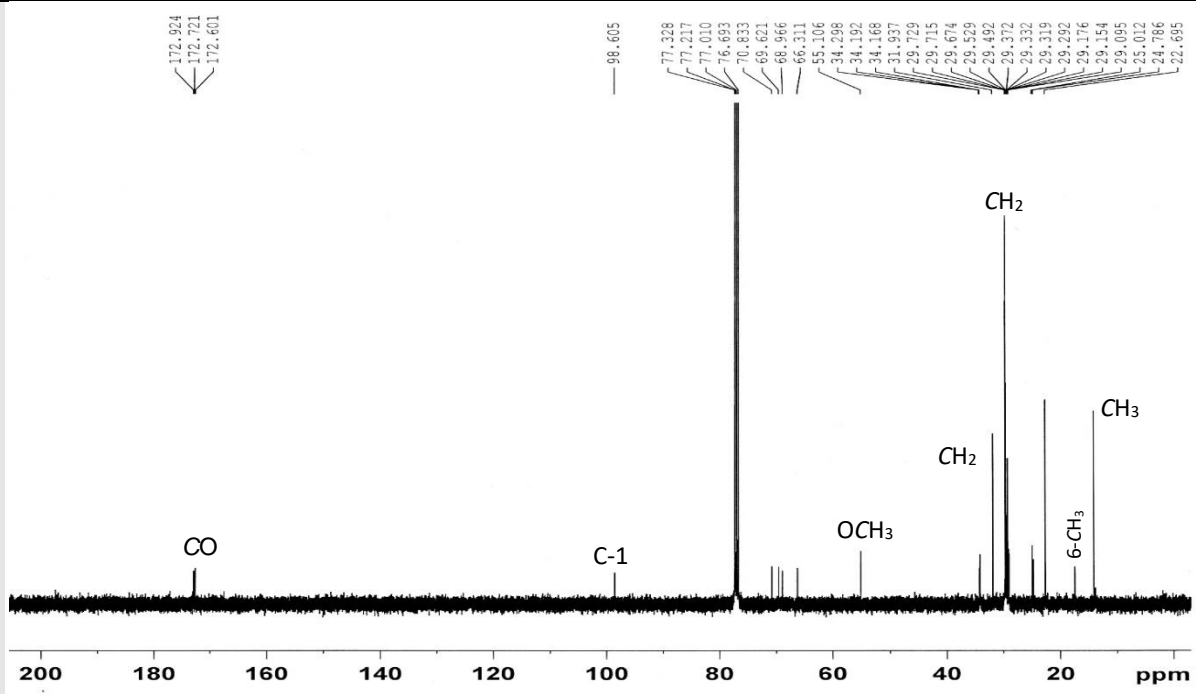

**Figure S18.** <sup>13</sup>C NMR (100 MHz, CDCl<sub>3</sub>) spectrum of compound 6.

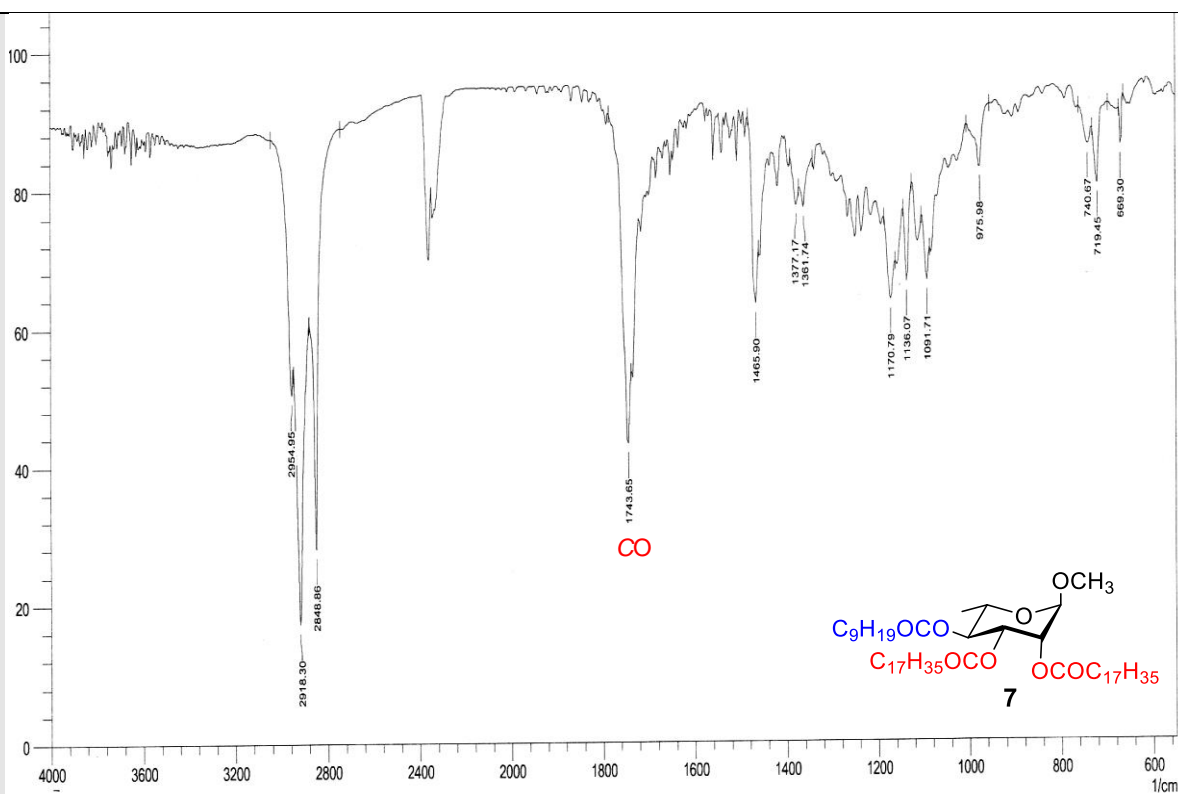

**Figure S19.** IR (neat) spectrum of compound 7.

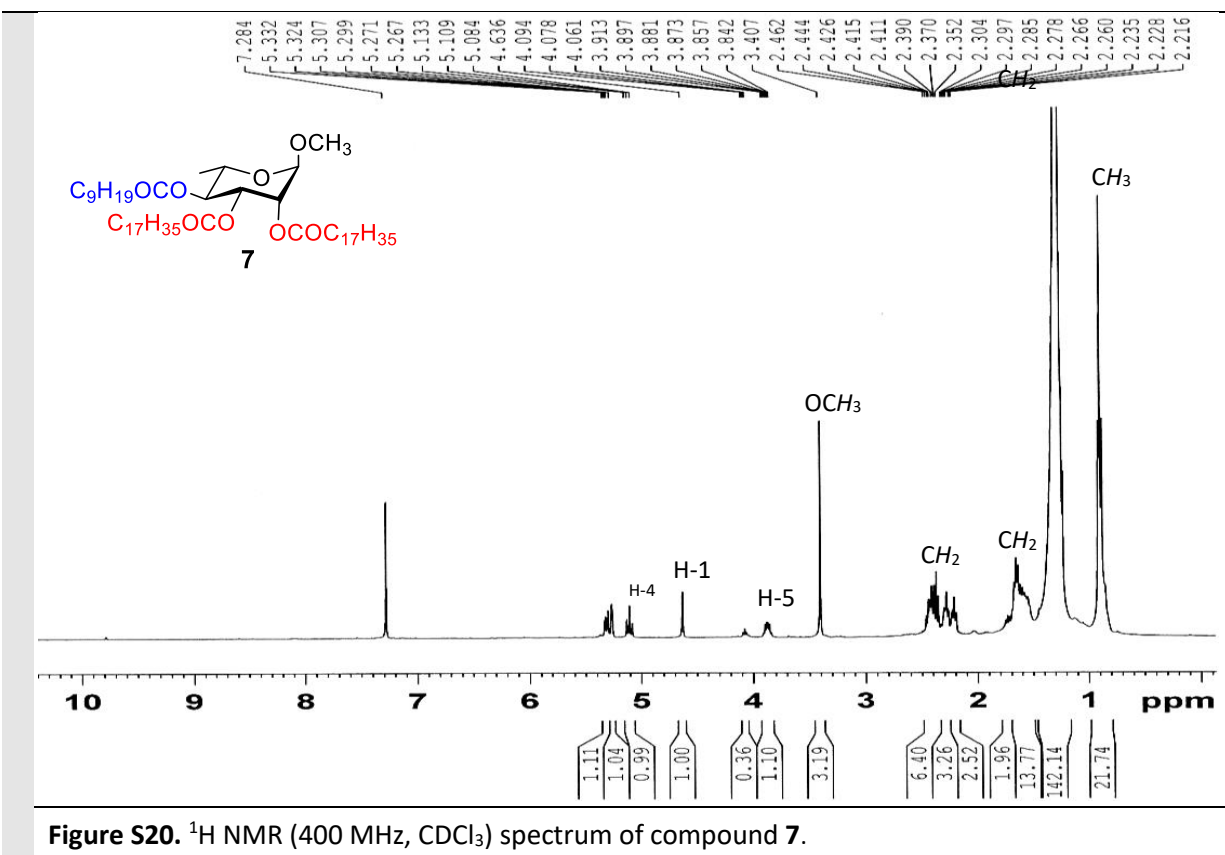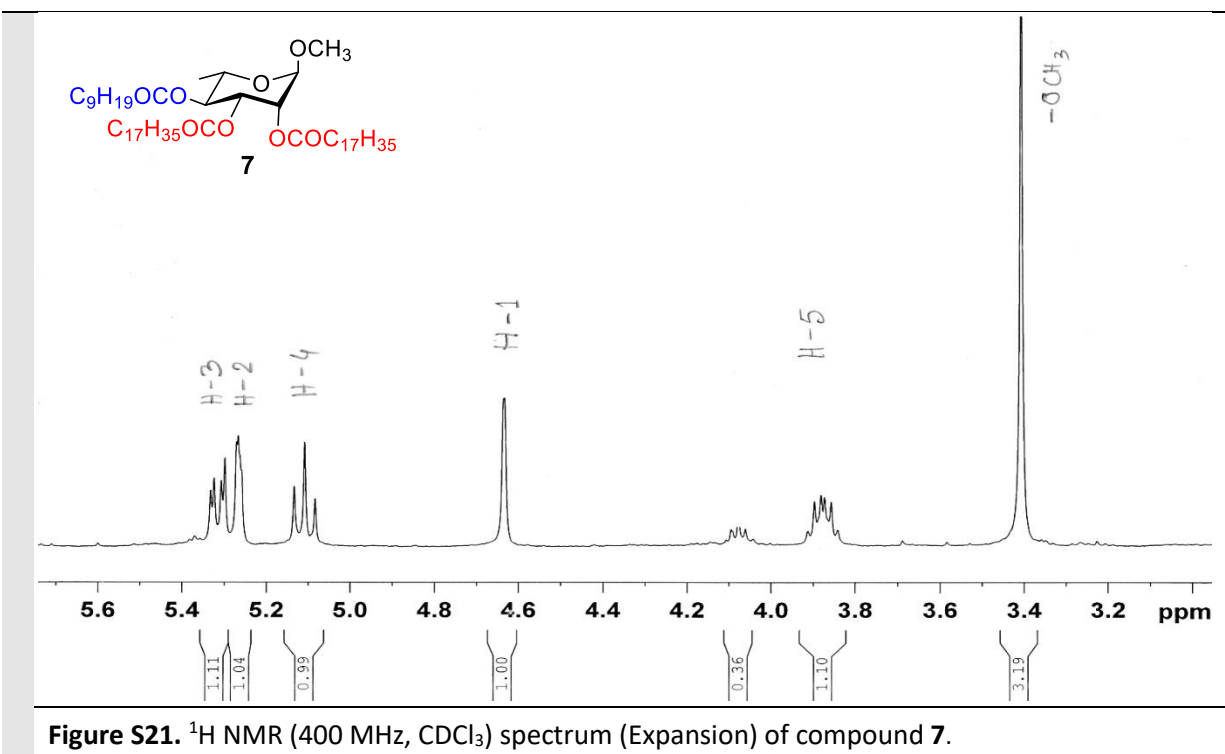

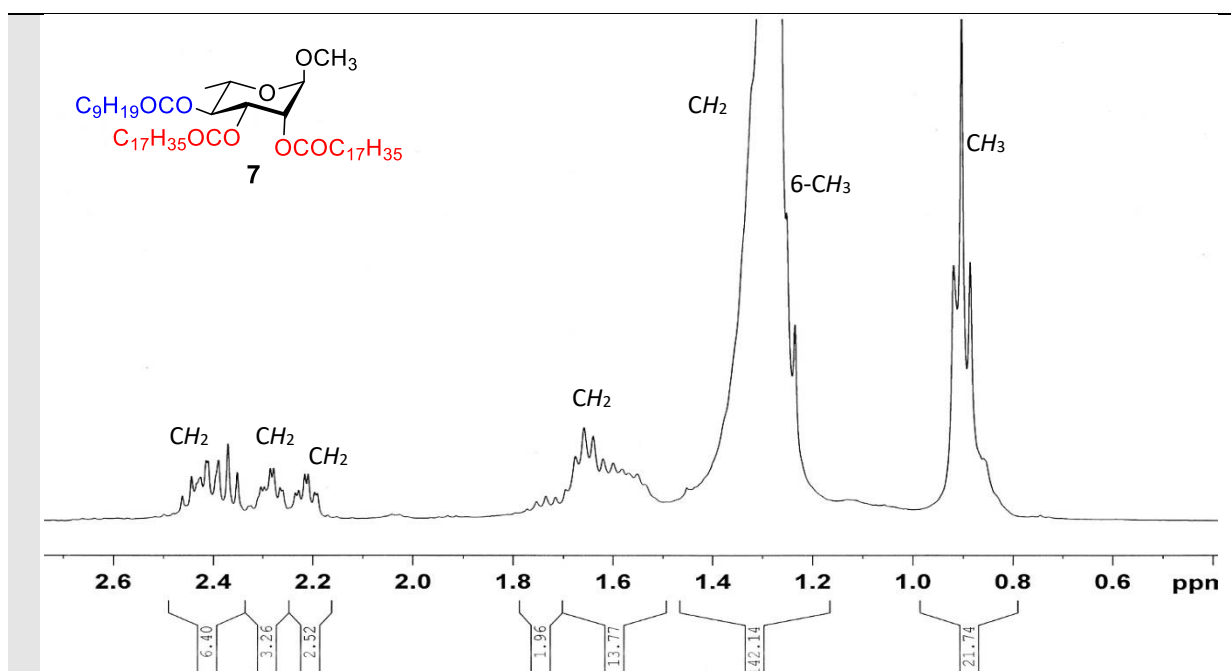

**Figure S22.** <sup>1</sup>H NMR (400 MHz, CDCl<sub>3</sub>) spectrum (Expansion) of compound 7.

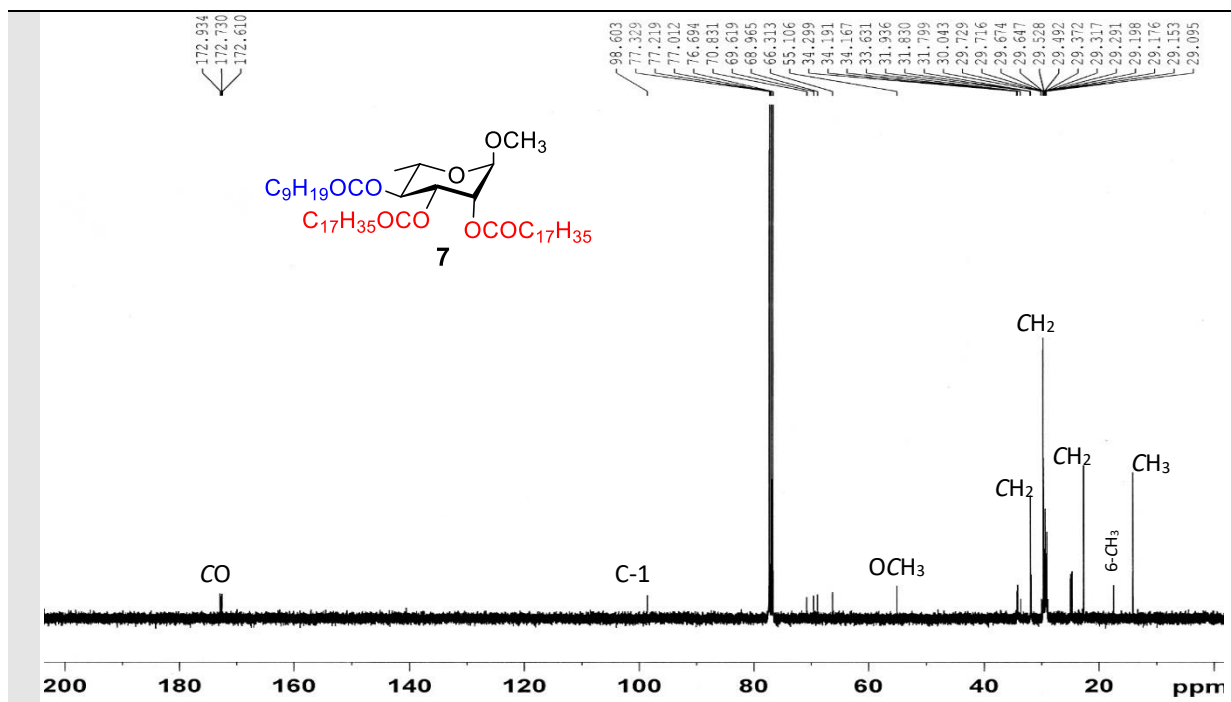

**Figure S23.** <sup>13</sup>C NMR (100 MHz, CDCl<sub>3</sub>) spectrum of compound 7.

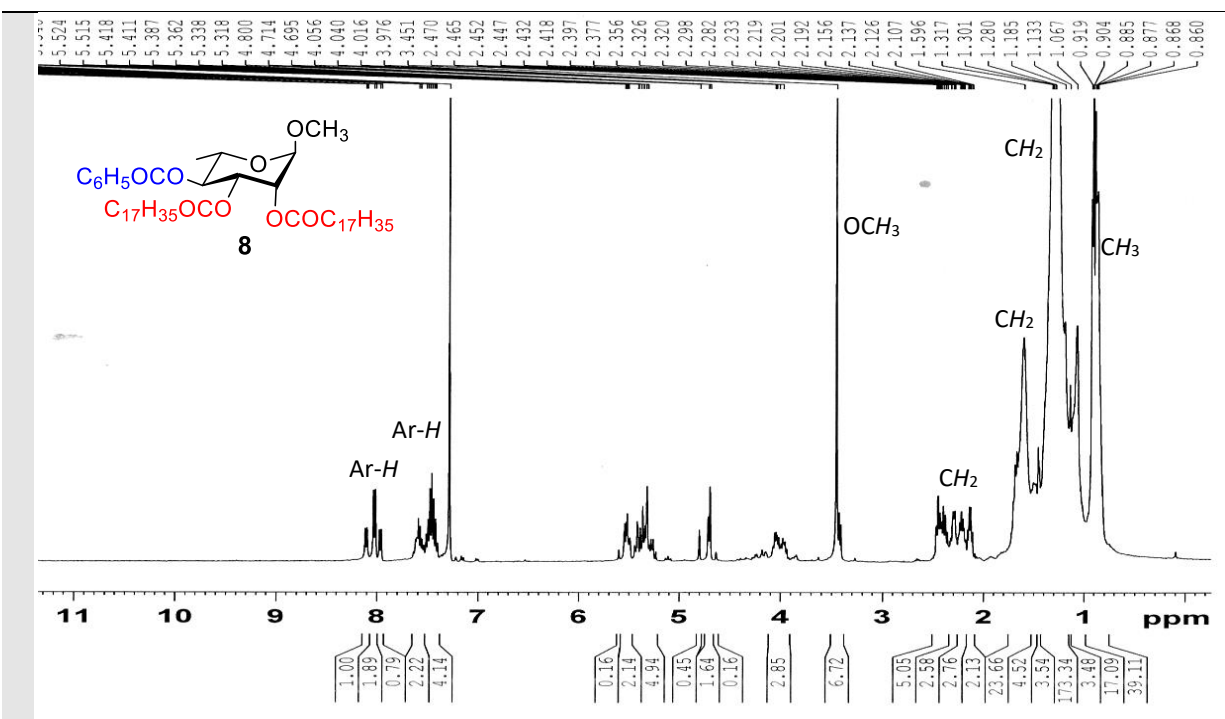

Figure S24. <sup>1</sup>H NMR (400 MHz, CDCl<sub>3</sub>) spectrum of compound 8.

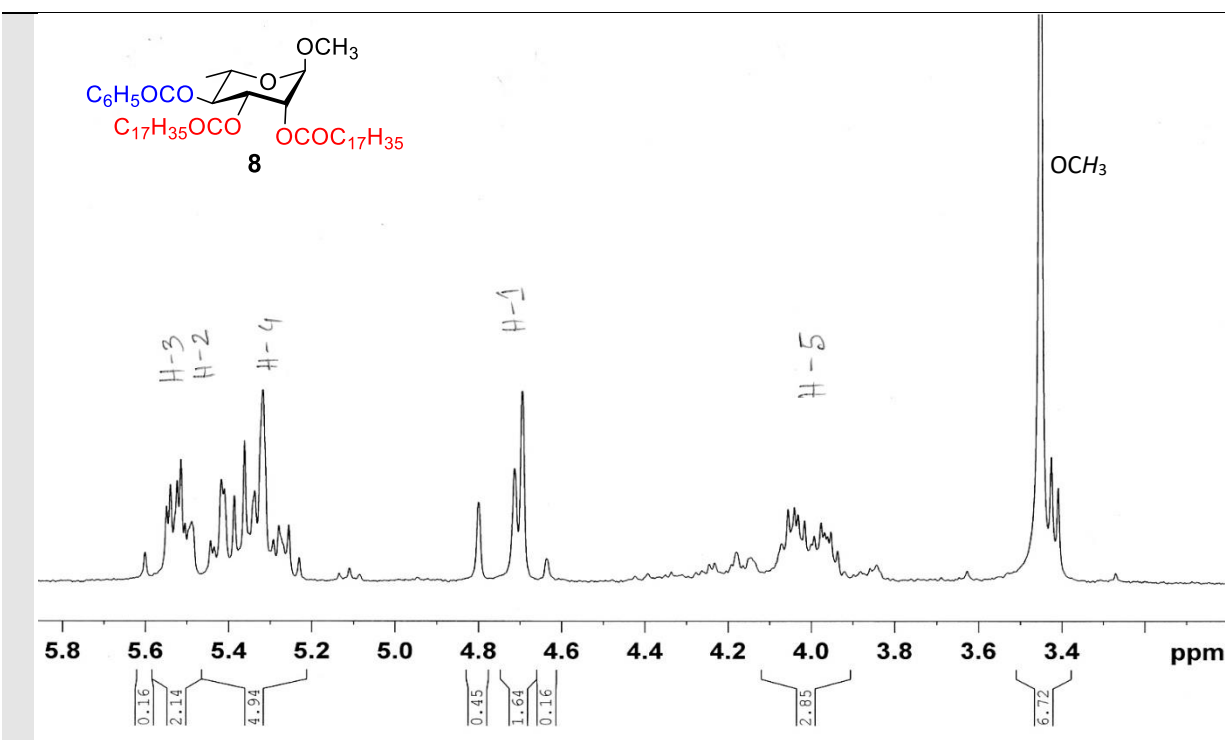

Figure S25. <sup>1</sup>H NMR (400 MHz, CDCl<sub>3</sub>) spectrum (Expansion) of compound 8.

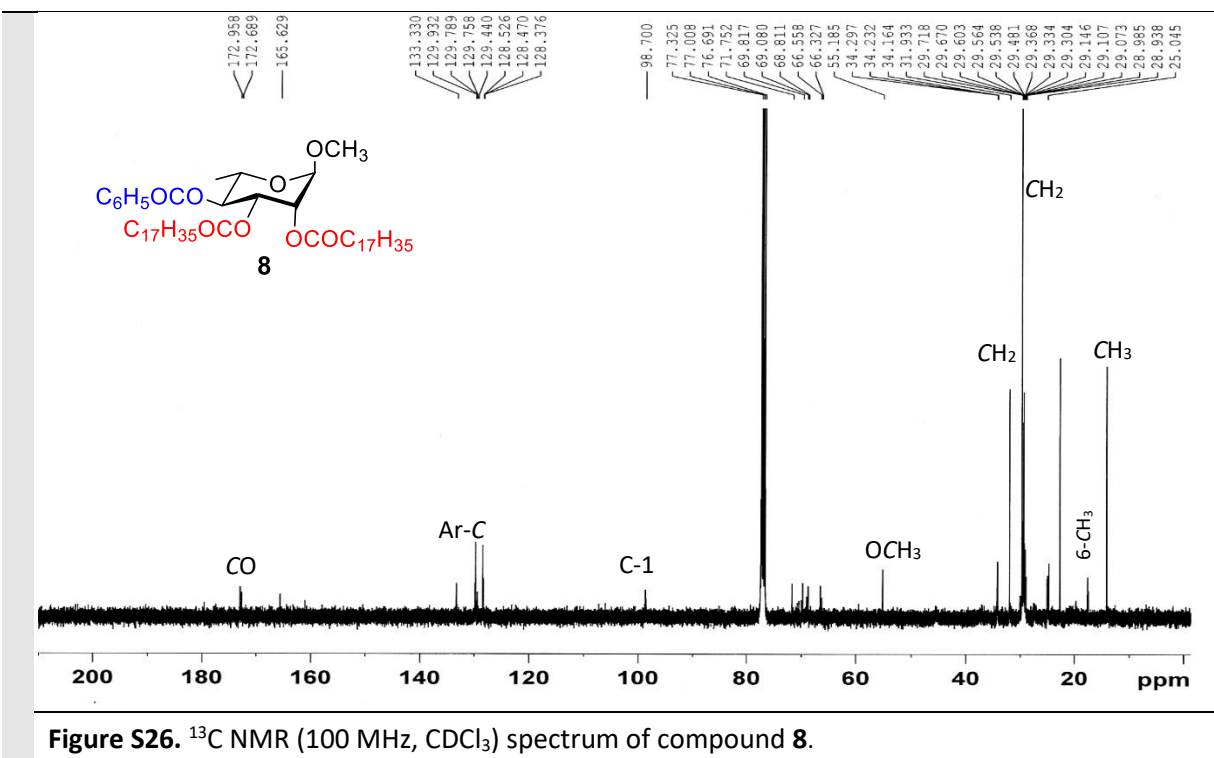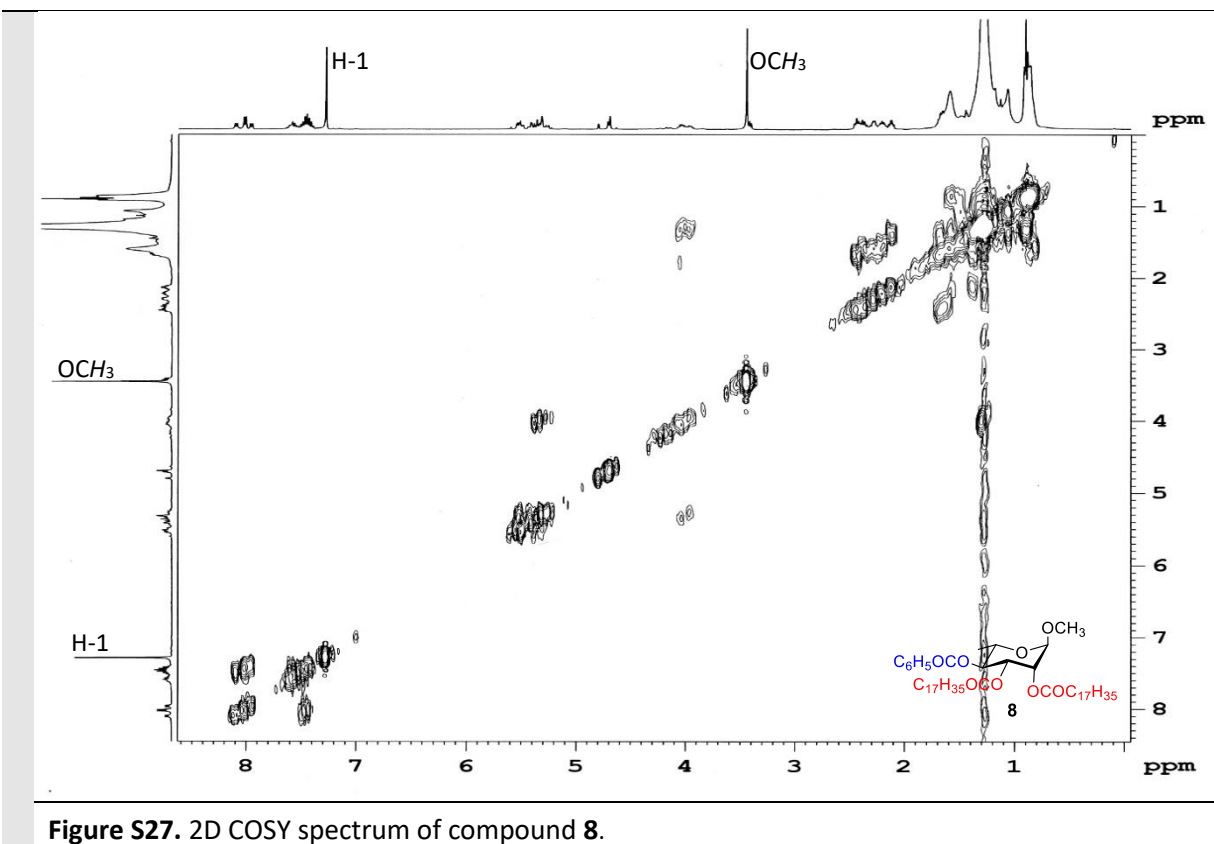

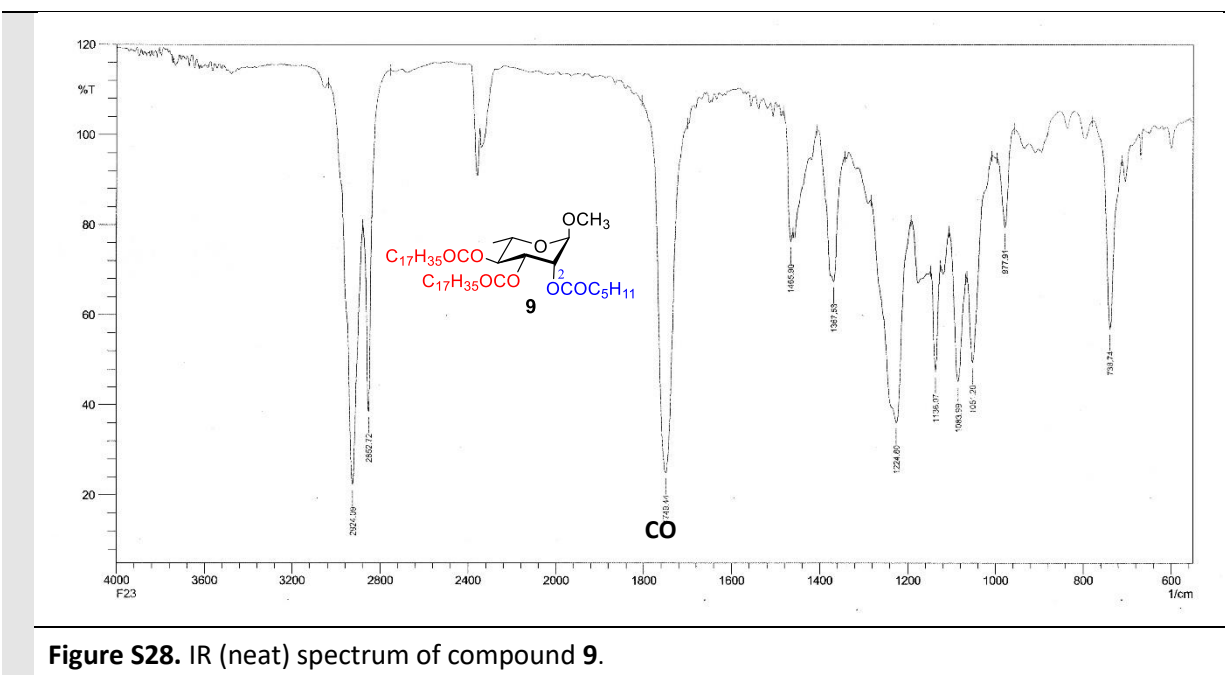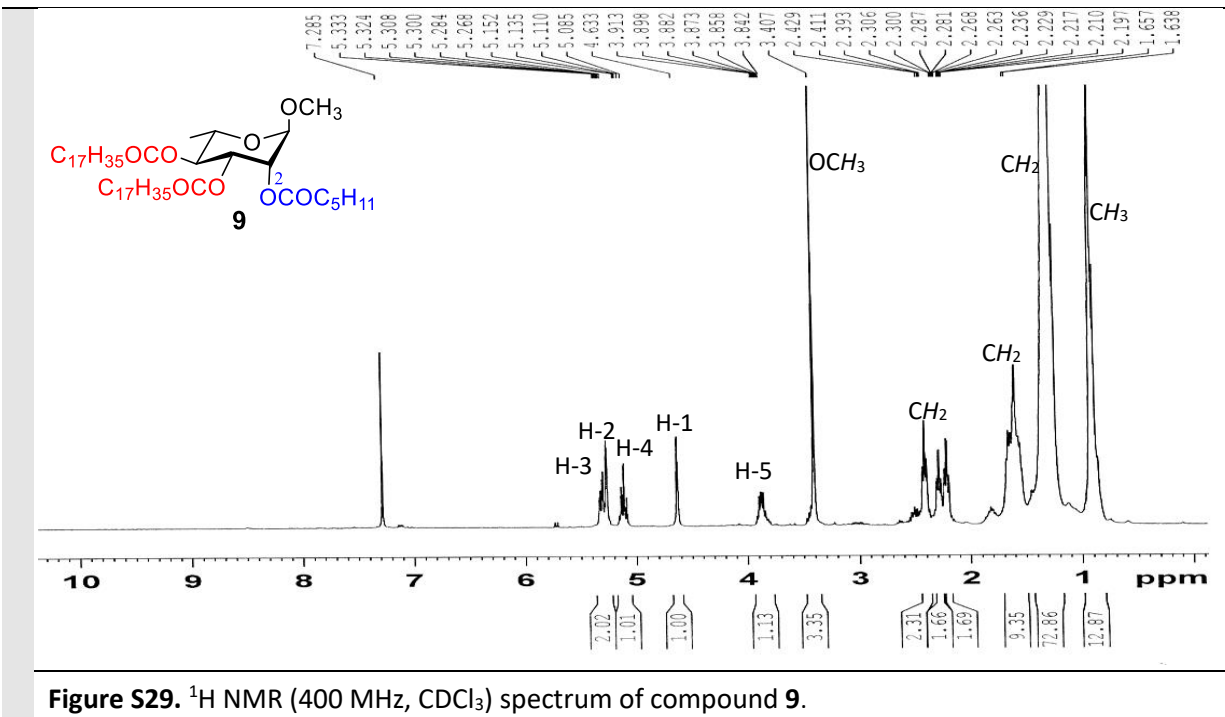

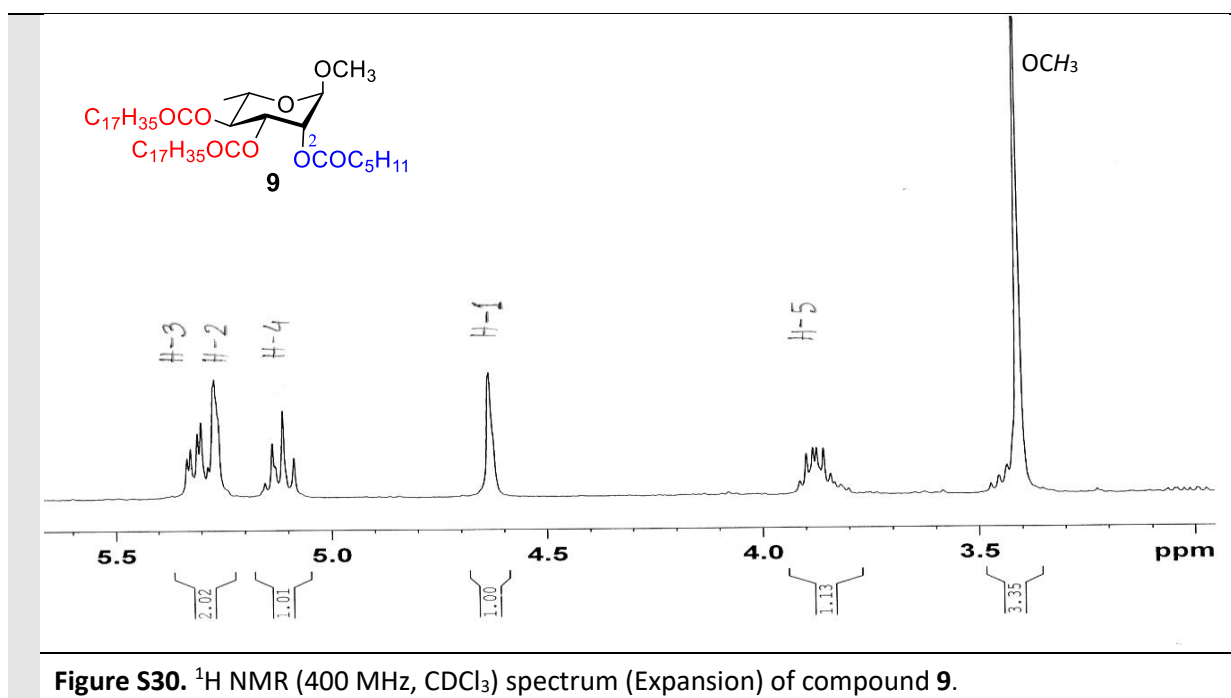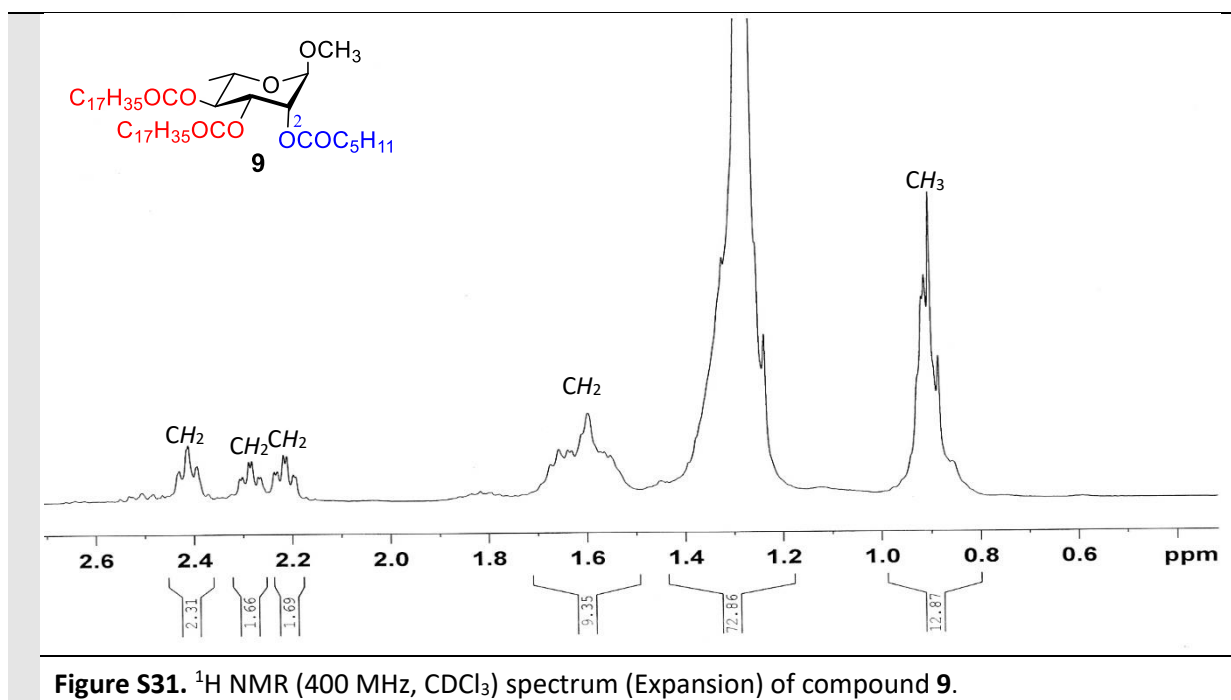

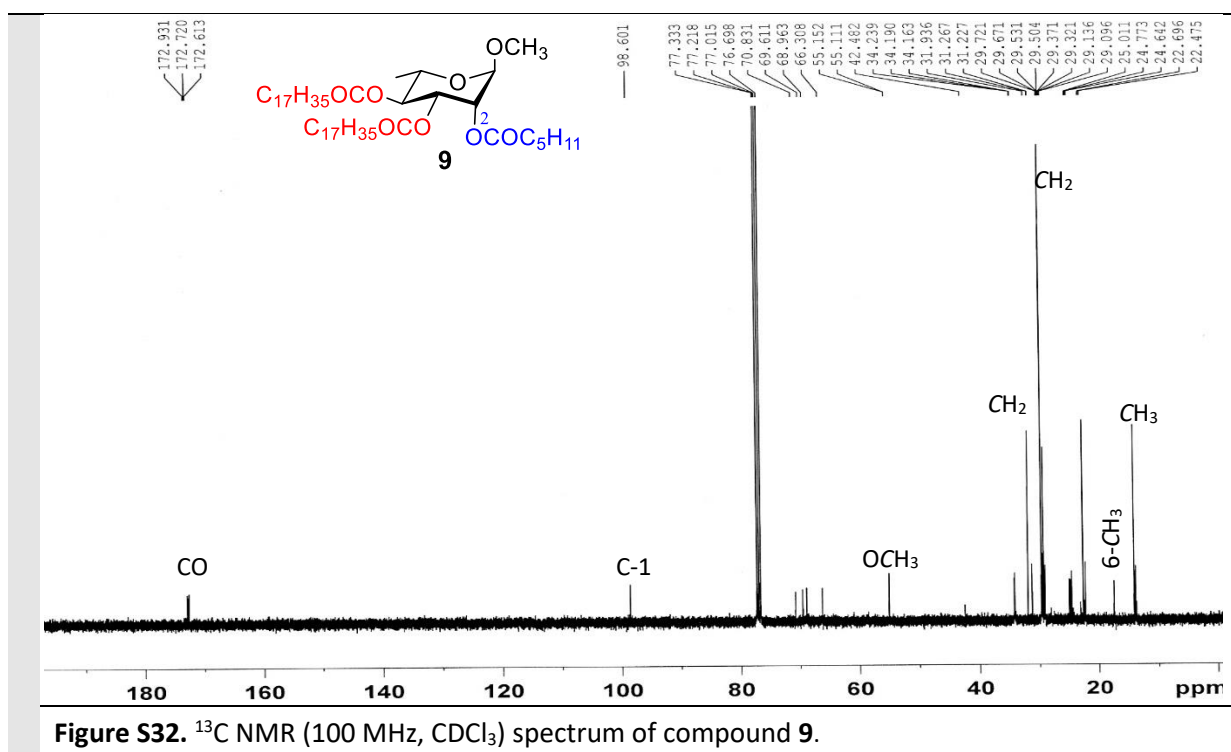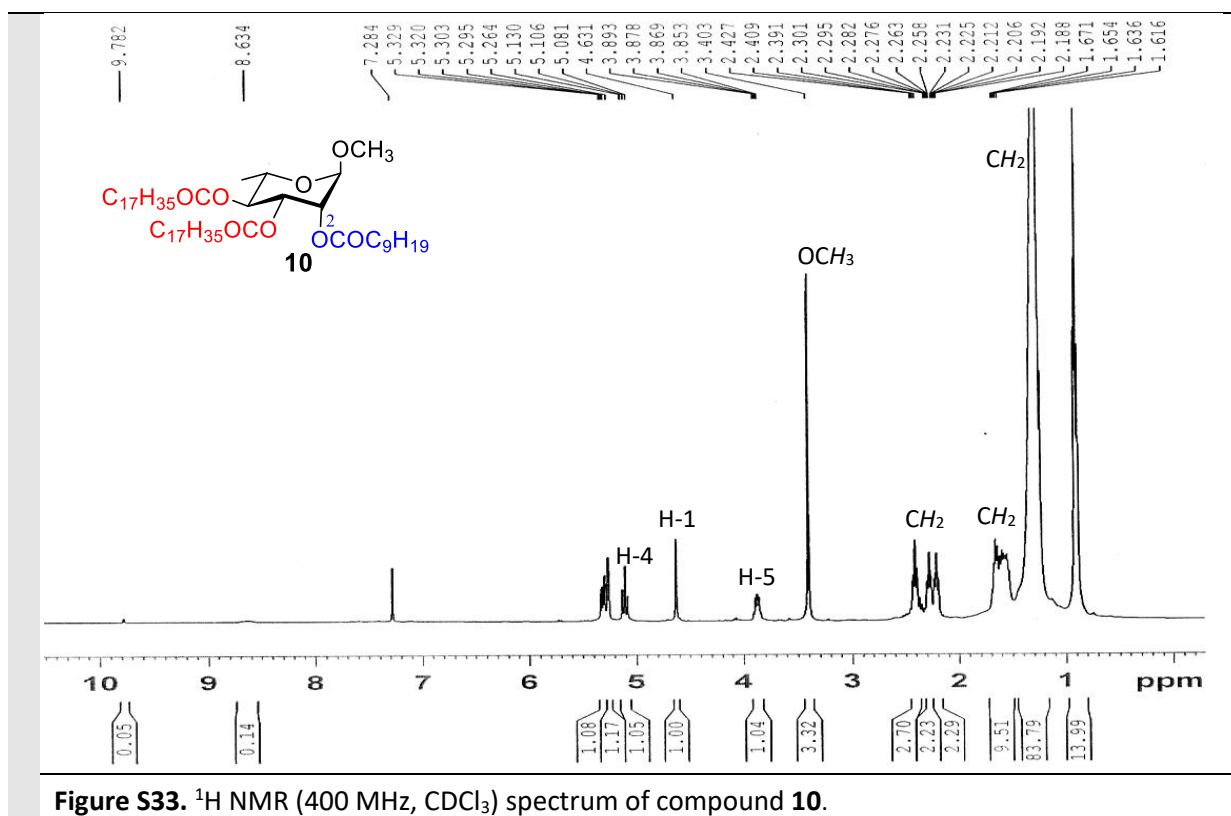

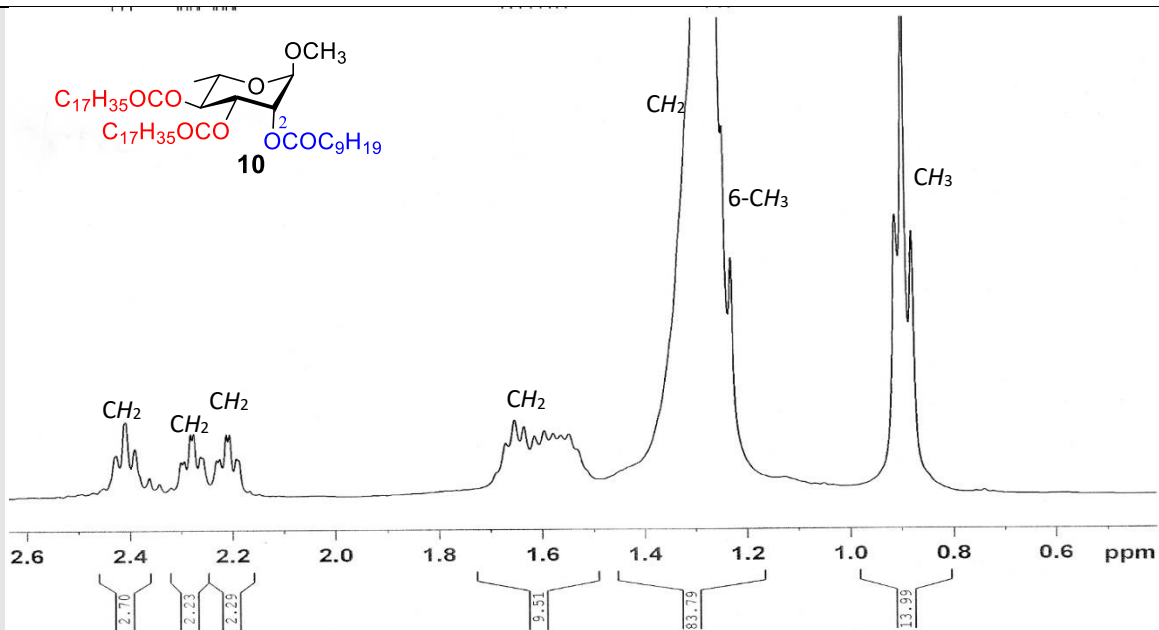

**Figure S34.** <sup>1</sup>H NMR (400 MHz, CDCl<sub>3</sub>) spectrum (Expansion) of compound 10.

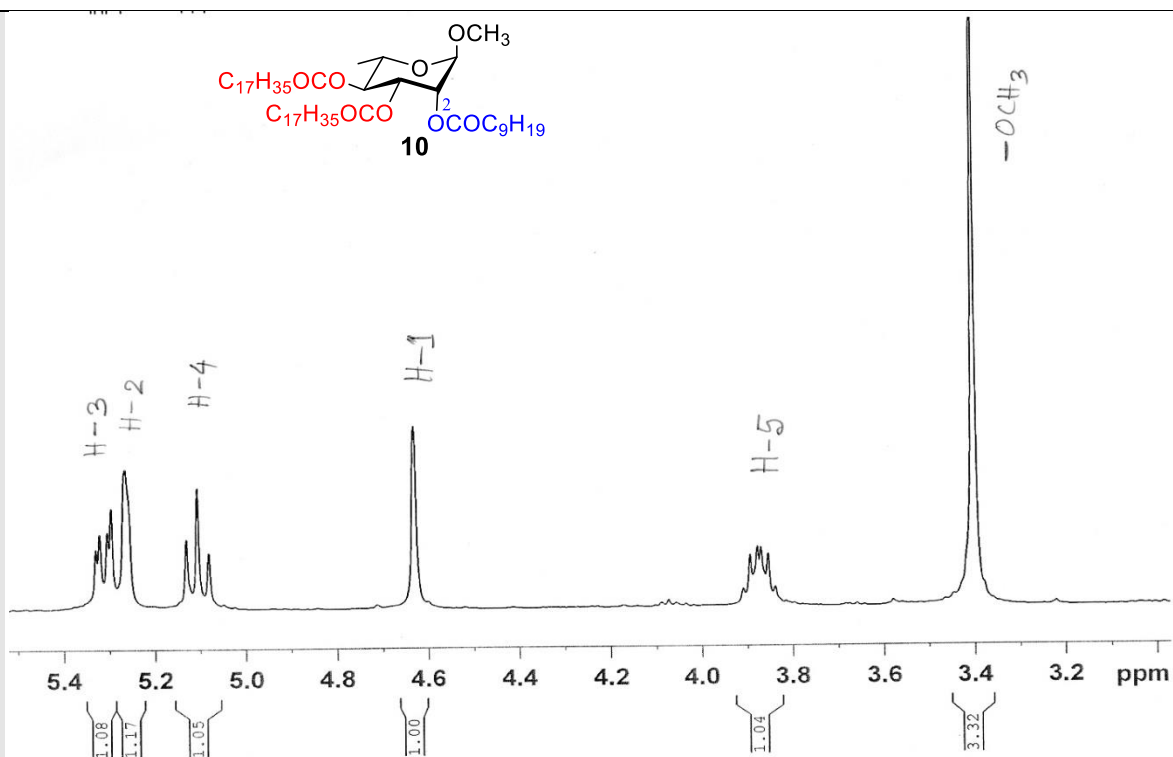

**Figure S35.** <sup>1</sup>H NMR (400 MHz, CDCl<sub>3</sub>) spectrum (Expansion) of compound 10.

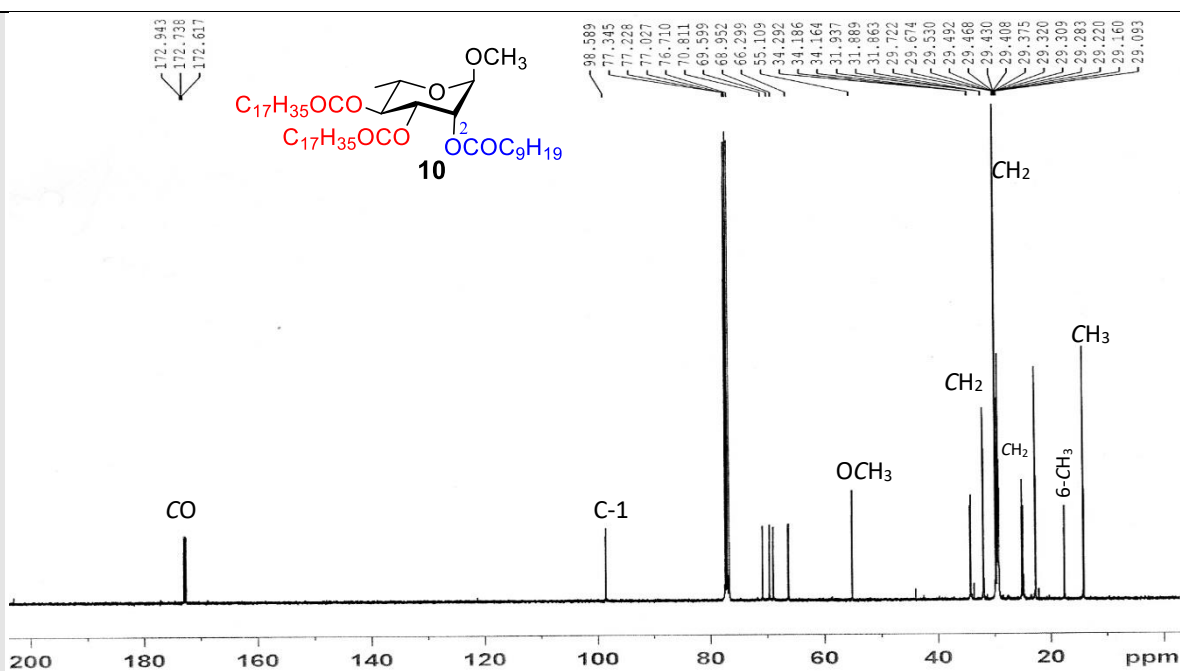

**Figure S36.**  $^{13}C$  NMR (100 MHz,  $CDCl_3$ ) spectrum of compound 10.

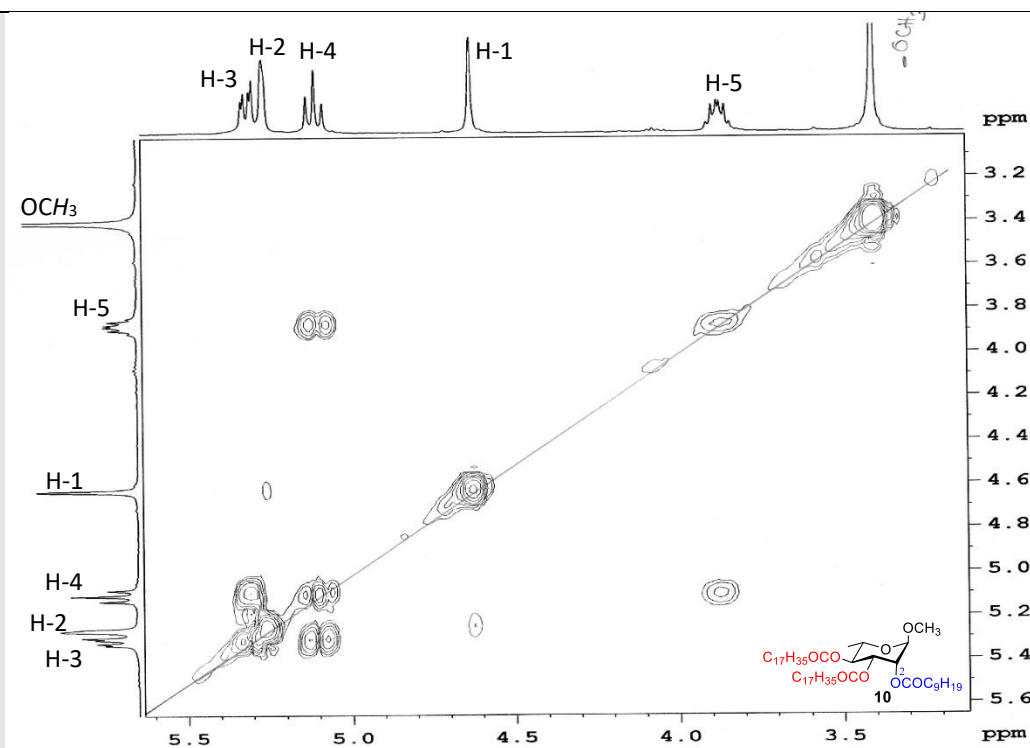

**Figure S37.** 2D COSY spectrum (Expansion) of compound 10.

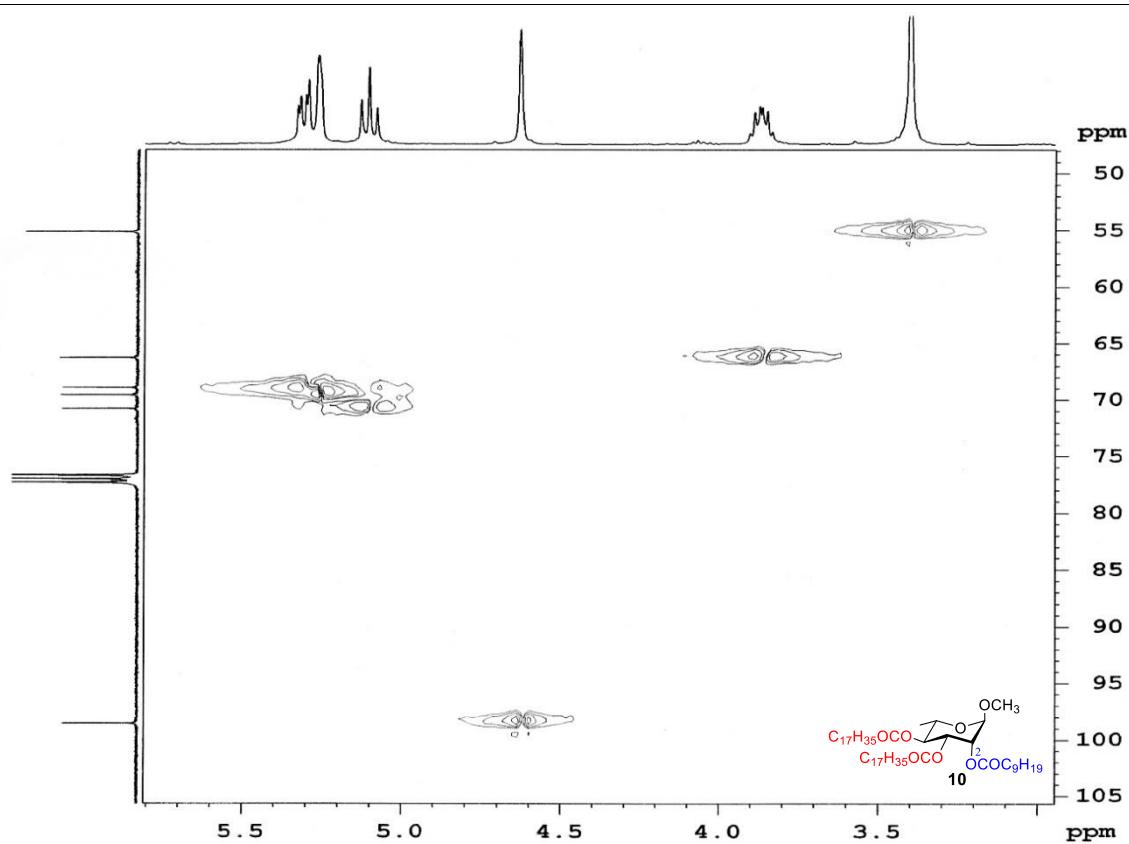

**Figure S38.** 2D HSQC spectrum (Expansion) of compound **10**.

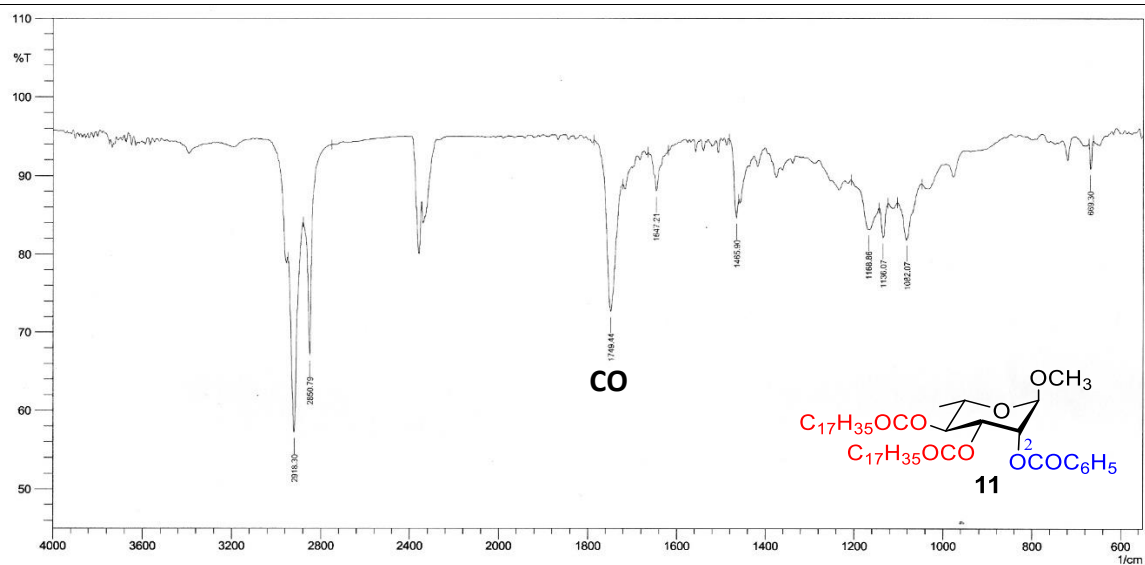

**Figure S39.** FT-IR (neat) spectrum of compound **11**.

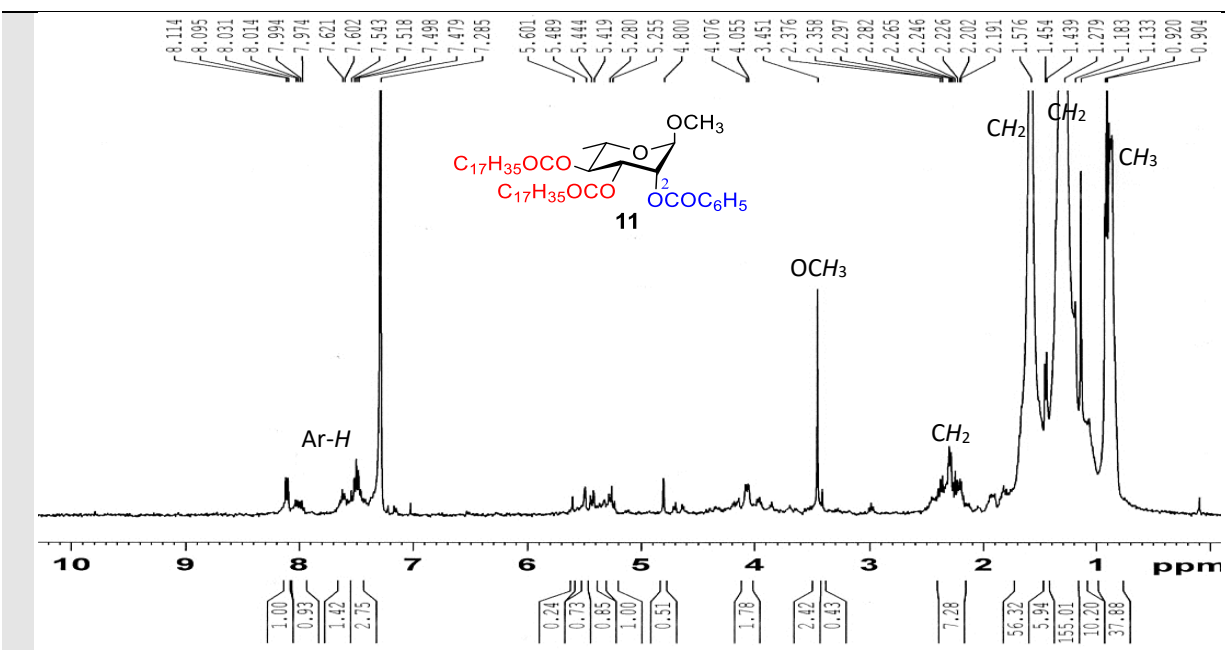

**Figure S40.**  $^1H$  NMR (400 MHz,  $CDCl_3$ ) spectrum of compound **11**.
